# Supplementary material for: Older patients’ perception of deprescribing in resource-limited settings: a cross-sectional study in an Ethiopia university hospital
Source: PubMed Central journal article supplement — BMJ Open. 2018 Apr 20;8(4):e020590. doi: 10.1136/bmjopen-2017-020590 (PMC5914769; doi:10.1136/bmjopen-2017-020590), 2018-04-20
Supplement: bmjopen-2017-020590.draft_revisions.pdf [file bmjopen-2017-020590.draft_revisions.pdf]

# BMJ Open

BMJ Open is committed to open peer review. As part of this commitment we make the peer review history of every article we publish publicly available.

When an article is published we post the peer reviewers' comments and the authors' responses online. We also post the versions of the paper that were used during peer review. These are the versions that the peer review comments apply to.

The versions of the paper that follow are the versions that were submitted during the peer review process. They are not the versions of record or the final published versions. They should not be cited or distributed as the published version of this manuscript.

BMJ Open is an open access journal and the full, final, typeset and author-corrected version of record of the manuscript is available on our site with no access controls, subscription charges or pay-per-view fees (<http://bmjopen.bmj.com>).

If you have any questions on BMJ Open's open peer review process please email [info.bmjopen@bmj.com](mailto:info.bmjopen@bmj.com)

# BMJ Open

## Deprescribing and reduction of inappropriate polypharmacy in resource limited settings: Older patients' perception in an Ethiopia University Hospital.

|                                 |                                                                                                                                                                                                                                                                                                                                                                                                                                                                                                                                                                                           |
|---------------------------------|-------------------------------------------------------------------------------------------------------------------------------------------------------------------------------------------------------------------------------------------------------------------------------------------------------------------------------------------------------------------------------------------------------------------------------------------------------------------------------------------------------------------------------------------------------------------------------------------|
| Journal:                        | <i>BMJ Open</i>                                                                                                                                                                                                                                                                                                                                                                                                                                                                                                                                                                           |
| Manuscript ID                   | bmjopen-2017-020590                                                                                                                                                                                                                                                                                                                                                                                                                                                                                                                                                                       |
| Article Type:                   | Research                                                                                                                                                                                                                                                                                                                                                                                                                                                                                                                                                                                  |
| Date Submitted by the Author:   | 14-Nov-2017                                                                                                                                                                                                                                                                                                                                                                                                                                                                                                                                                                               |
| Complete List of Authors:       | Tegegn, Henok; University of Gondar, Clinical Pharmacy<br>Tefera, Yonas; University of Gondar, Clinical pharmacy<br>Erku, Daniel ; University of Gondar, Clinical Pharmacy<br>Haile, Kaleab ; University of Gondar, Pharmaceutics and Social Pharmacy<br>Abebe, Tamrat; University of Gondar, Clinical Pharmacy; Karolinska Institute, Department of Learning, Informatics, Management and Ethics (LIME)<br>Chekol, Fasil; University of Gondar, Clinical Pharmacy<br>azanaw, yonas ; University of Gondar, Clinical Pharmacy<br>Ayele, Asnakew ; University of Gondar, Clinical Pharmacy |
| <b>Primary Subject Heading</b>: | Geriatric medicine                                                                                                                                                                                                                                                                                                                                                                                                                                                                                                                                                                        |
| Secondary Subject Heading:      | Medical management, Patient-centred medicine, Communication, General practice / Family practice                                                                                                                                                                                                                                                                                                                                                                                                                                                                                           |
| Keywords:                       | Attitude, medication discontinuation, Deprescribing, Polypharmacy, elderly, rPATD                                                                                                                                                                                                                                                                                                                                                                                                                                                                                                         |
|                                 |                                                                                                                                                                                                                                                                                                                                                                                                                                                                                                                                                                                           |

SCHOLARONE™  
Manuscripts

1  
2  
3 **Deprescribing and reduction of inappropriate polypharmacy in resource limited settings:**  
4  
5 **Older patients' perception in an Ethiopia University Hospital**  
6  
7  
8  
9

10 Henok Getachew Tegegn<sup>1</sup>, Yonas Getaye Tefera<sup>1</sup>, Daniel Asfaw Erku<sup>1</sup>, Kaleab Taye Haile<sup>3</sup>,  
11 Tamrat Befekadu Abebe<sup>1,2</sup>, Fasil Chekol<sup>1</sup>, Yonas Azanaw<sup>1</sup>, Asnakew Achaw Ayele<sup>1</sup>  
12

13 <sup>1</sup>Department of Clinical Pharmacy, University of Gondar, Gondar, Amhara, Ethiopia  
14

15 <sup>2</sup>Masters program in health economics, policy and management; Student; Department of  
16 Learning, Informatics, Management and Ethics (LIME); Karolinska Institute; Solna; Sweden  
17

18 <sup>3</sup>Department of Pharmaceutics and Social Pharmacy, University of Gondar, Gondar, Amhara,  
19 Ethiopia  
20  
21  
22  
23  
24  
25  
26  
27  
28  
29  
30  
31  
32

33 **CORRESPONDING AUTHOR**  
34

35 Henok Getachew Tegegn (BPharm, MSc)  
36

37 Assistant Professor of Clinical Pharmacy  
38

39 Clinical Pharmacy Department, School of Pharmacy, University of Gondar, Ethiopia  
40

41 P.O. Box: 196, Gondar, Ethiopia  
42

43 Tel: +251911438077  
44

45 Email Address: [heniget@gmail.com](mailto:heniget@gmail.com)  
46  
47  
48  
49  
50  
51  
52  
53  
54  
55  
56  
57  
58  
59  
60

## Abstract

**Objectives:** We assessed whether socio-demographic and clinical data were associated with older patients' attitude towards deprescribing of inappropriate medications.

**Design** This was Institutional-based quantitative cross-sectional survey.

**Setting** Data collection was conducted the outpatient clinics of University of Gondar referral and teaching hospital (UoGRTH) in Ethiopia.

**Participants** Older patients aged 65 or greater with at least one medication were enrolled in the study from March 1 to June 30, 2017. Exclusion criteria were patients who had severe physical or psychological problems and those who refused to participate. Of 351 eligible participants, 316 elderly patients completed the survey data.

**Main outcome measures:** Older patients' attitude towards deprescribing was measured using the validated tool of revised Patients' Attitudes towards Deprescribing (rPATD) for older patients. Predictive variables were Sociodemographic and clinical data such as comorbidity and polypharmacy. Older patients' attitude towards deprescribing was an interest of outcome.

**Results** Of 316 older patients enrolled in this study, most of them (65.2%) have overall poor attitude towards deprescribing. There was a significant difference among polypharmacy and non-polypharmacy in appropriateness factors overall score ( $10.94 \pm 1.98$  Vs.  $10.16 \pm 2.09$ ,  $P= 0.009$ ). Moreover, patients with polypharmacy had more burden factor score than non – polypharmacy patients ( $12.71 \pm 2.58$  Vs.  $10.95 \pm 3.23$  respectively,  $P= < 0.0001$ ). Patients who are unable to read and write are more likely to have poor attitude towards deprescribing (AOR [0.219(0.077-0.622),  $P$ -value= 0.004]. A one unit increase in patient's number of medications will result in 1.2 increases to good attitude to deprescribing; AOR [1.211(1.026-1.430),  $P$ -value= 0.023].

**Conclusion:** About 65.2% older patients have overall poor attitude toward discontinuing medications (deprescribing). Polypharmacy and educational status were identified as the common risk factors to patients' willingness to deprescribing. Health care providers should be proactive to discuss, evaluate and decision making of potentially in appropriate medications.

**Key words:** Attitude; medication discontinuation; Deprescribing; Polypharmacy; Elderly; rPATD

### Strengths and limitations of this study

- Older patients' attitude towards deprescribing and their willingness to stop medicines has been assessed for the first time in resource limited setting like Ethiopia
- This study utilized a validated multidimensional questionnaire in relatively large number of patients.
- The type of disease they have, the medicine category, type and duration of the medication might affect patients' willingness and perception towards deprescribing.
- Owing to the interviewer based questionnaire structured for quantitative research, it does not permit in-depth investigation of patient attitude.
- Care givers for older patients have not been included as they may affect on the preference and willingness to stop medicines.

### Introduction

Polypharmacy often defined as the use of five or more medications, has been linked with pervasive adverse drug events and ultimately leads to increased morbidity, mortality and healthcare costs [1-3]. Polypharmacy-related adverse drug events (ADEs) are very common and estimated to occur in 25% of ambulatory care patients [3].

De-prescribing, one of the approaches to prevent polypharmacy-related ADEs, is a process of detecting and stopping medications when the actual or potential harms exceeds the actual or potential benefits taking into consideration a variety of factors including the individual patient's therapeutic care plans, level of functioning and needs [4]. Deprescribing has a number of benefits to the patient including reducing costs associated with medicines and their ADEs, improving

1  
2  
3 adherence and overall quality of life [5]. This is especially true in resource limited countries such  
4 as Ethiopia, where the main source of drug expenditure is patients' out of pocket money and a  
5 significant percentage of the population purchase medicines from private drug retail outlets [6].  
6  
7

8  
9  
10 While concepts such as adherence and medication reconciliation receive considerable attention,  
11 and covered by a wide range of literatures worldwide, little attention has been given to the  
12 concept of de-prescribing and reduction of inappropriate polypharmacy [7]. Despite the  
13 prescribers' positive attitude on de-prescribing [8], many factors including clinical uncertainty  
14 and shared responsibility with other healthcare providers severely impede clinicians' ability to  
15 proactivity discontinue medications [9]. Moreover, patient perspectives on deprescribing and  
16 their communication with clinicians are equally important in evidence based medication  
17 discontinuation process.  
18  
19

20  
21  
22 Several studies conducted in developed countries regarding older people's attitudes toward  
23 deprescribing reported a higher rate of willingness to discontinue their medications ranging from  
24 40.5% to 90% [10-12]. However, no previous study has explored the attitudes of Ethiopian older  
25 patients regarding their medications and deprescribing. It is also uncertain how patients would  
26 respond to a suggestion from a clinician to intentionally discontinue a medication. Taking the  
27 global evidence into consideration and due to lack of data in Ethiopia, we sought to identify  
28 Ethiopian older patients' willingness to have their medications deprescribed.  
29  
30

## 31 32 33 34 35 36 37 38 39 40 41 42 43 44 45 46 47 **Methods**

### 48 49 **Study design and setting**

50  
51 Institutional-based quantitative cross-sectional survey was conducted from March 1 to June 30,  
52 2017 at University of Gondar referral and teaching hospital (UoGRTH), Ethiopia. The hospital is  
53 located in Gondar town, northwest Ethiopia, 738km away from Addis Ababa and it's the only  
54  
55  
56  
57  
58  
59  
60

1  
2  
3 referral and teaching center in the area to which majority of patients with chronic diseases  
4 including hypertension, diabetes mellitus, cancer and asthma are referred.  
5  
6

### 7 8 **Participants** 9

10 All elderly ( $\geq 65$  years) patients who has been taking at least one medication regardless of their  
11 diagnosis and who visited the outpatient clinic of University of Gondar referral and teaching  
12 hospital (UoGRTH) for follow-up and medication refill were our study population. Patients who  
13 had severe physical or psychological problems which leads to inability to complete the interview  
14 and those who refused to participate were excluded from the survey. Of 351 eligible participants  
15 obtained during the study period, 316 elderly patients completed the survey data.  
16  
17  
18  
19  
20  
21  
22  
23

### 24 **Survey instrument** 25

26 Data was collected by three of the principal investigators through interviewer-administered  
27 questionnaire. The investigators were properly trained on the instrument and ways of  
28 approaching the patients and securing their permission for interview prior to the data collection  
29 process. We used Revised Patients' Attitudes towards Deprescribing (rPATD) questionnaire  
30 [13]. It is a validated multidimensional questionnaire which measure patients' attitudes,  
31 knowledge and experiences related to medication discontinuation. A 4-point Likert response  
32 scale was used (strongly agree, agree, disagree and strongly disagree) in rPATD questionnaire.  
33  
34 The rPATD questionnaire has four major factors including Burden factor (4 items);  
35 Appropriateness factor (5 items); Concerns about stopping factor (4 items); Involvement factor  
36 (4items) and additional two global questions are also considered. The previously validated tool -  
37 Belief in Medicine use Questionnaire (BMQ)-Overuse [14] was utilized for comparison and  
38 validation of the rPATD questionnaire. The questionnaire, first prepared in English, was  
39 translated to Amharic language and back to English so as to ensure that the translated version  
40  
41  
42  
43  
44  
45  
46  
47  
48  
49  
50  
51  
52  
53  
54  
55  
56  
57  
58  
59  
60

1  
2  
3 gives the proper meaning. It was further pre-tested on 25 elderly patients, who were not included  
4  
5 in the final analysis, and slight modifications were instituted before the commencement of the  
6  
7 actual survey. Polypharmacy was defined as the use of  $\leq 5$  regular medications.  
8  
9

### 10 **Statistical analysis**

11  
12 All the statistical analyses were done using Statistical Package for Social Sciences (SPSS)  
13  
14 software version 21.0 for Windows (SPSS Inc., Chicago, IL). Frequencies and percentages were  
15  
16 used to express different variables. Data were screened for normality and homogeneity using the  
17  
18 Shapiro–Wilk and Levene tests respectively. Respondents were stratified by polypharmacy status  
19  
20 to examine attitudes toward deprescribing in patients with polypharmacy. Binary logistic  
21  
22 regression was performed to assess the association between attitude towards deprescribing and  
23  
24 predictor variables. The level of statistical significance was defined as  $p < 0.05$  and all tests were  
25  
26 two-tailed.  
27  
28  
29  
30  
31  
32  
33

### 34 **Operational definitions:**

35  
36 Deprescribing: is a process of optimization of medication regimens through termination of  
37  
38 potentially inappropriate medications. It is the planned and supervised process of dose reduction  
39  
40 or stopping of medication that might be causing harm or might not be longer providing benefit.  
41  
42  
43

44 Poly pharmacy: Polypharmacy is defined as the practice of prescribing five or more medications  
45  
46 to the same person.  
47  
48

49 Poor attitude: The rPATD questionnaire having 19 items may score ranging from the lowest  
50  
51 point of 19 up to the highest 76 and those scored below 50% of the total score taken as a cut of  
52  
53 point for poor attitude.  
54  
55  
56  
57  
58  
59  
60



Good attitude: The rPATD score range from the lowest point of 19 up to the highest 76 and the rPATD score above 50% of the total score taken as a cut of point for good attitude.

### Ethical Consideration

This study was approved by the Ethical committee of School of Pharmacy, University of Gondar with an approval number of UoG-SoP-131/2017. Written informed consent from the respondents was also obtained before conducting this study. Participants' information obtained was kept confidential.

### Results

Out of 351 patients approached, 316 of them completed the questionnaire, giving a response rate of 90 %. Most of the participants were men (173 individuals, 54.92 %) and the mean age was  $71.36 \pm 6.09$  years. The mean number of their daily medications was  $3.43 \pm 1.50$ . From the total number of participants, 62 (19.7%) were on polypharmacy. The most common comorbidities in polypharmacy groups were hypertension, diabetes mellitus and asthma. While in non – polypharmacy study participants, hypertension, heart failure and chronic kidney disease were more prominent. Details of socio characteristics of the study participants is tabulated in Table 1.

**Table 1:** Sociodemographic and clinical characteristics of study participants, UoGRTH, Ethiopia (n = 316).

| Variable                              | Polypharmacy n (%) |                  |
|---------------------------------------|--------------------|------------------|
|                                       | Yes (n=62)         | No (n=253)       |
| <b>Gender</b>                         |                    |                  |
| Male                                  | 35 (56.45 %)       | 138 (54.55 %)    |
| Female                                | 27 (43.55%)        | 115 (45.45%)     |
| <b>Age (Mean <math>\pm</math> SD)</b> | 69.87 $\pm$ 10.11  | 71.50 $\pm$ 6.31 |
| <b>Educational status</b>             |                    |                  |
| Unable to read and to write           | 37 (59.68 %)       | 165 (65.22 %)    |
| Primary school                        | 13 (20.97 %)       | 49 (19.37 %)     |
| Secondary School                      | 5 (8.06 %)         | 26 (10.28 %)     |
| Higher education                      | 7 (11.29 %)        | 13 (5.14 %)      |

| <b>Comorbidity</b>                            |                    |                    |
|-----------------------------------------------|--------------------|--------------------|
| Hypertension                                  | 27 (43.55 %)       | 67 (26.48 %)       |
| Heart failure                                 | 6 (9.68 %)         | 22 (8.70 %)        |
| Diabetes Mellitus                             | 8 (12.90 %)        | 13 (5.14 %)        |
| Chronic kidney disease                        | 3 (4.84 %)         | 20 (7.91 %)        |
| Asthma                                        | 5 (8.06 %)         | 10 (3.95 %)        |
| Rheumatoid Heart Disease                      | 2 (3.23 %)         | 14 (5.53 %)        |
| Others                                        | 11 (17.74 %)       | 107 (42.29 %)      |
| <b>Charlson Comorbidity index (Mean ± SD)</b> | <b>2.44 ± 0.90</b> | <b>1.85 ± 0.87</b> |
| <b>Number of Medication (Mean ± SD)</b>       | <b>5.85 ± 1.32</b> | <b>2.85 ± 0.76</b> |

Of 316 older patients, majority of the participants (65.2%) have overall poor attitude towards deprescribing. Figure 1 describes the percentage for Patient perception of deprescribing sub scores. Most of the patients had concerns about stopping factors as it is evidenced by 67.7% polypharmacy and 68.6% non – polypharmacy groups. The least concern was on the general questions on deprescribing (24.35 % of polypharmacy and 24.50 % of non – polypharmacy groups).

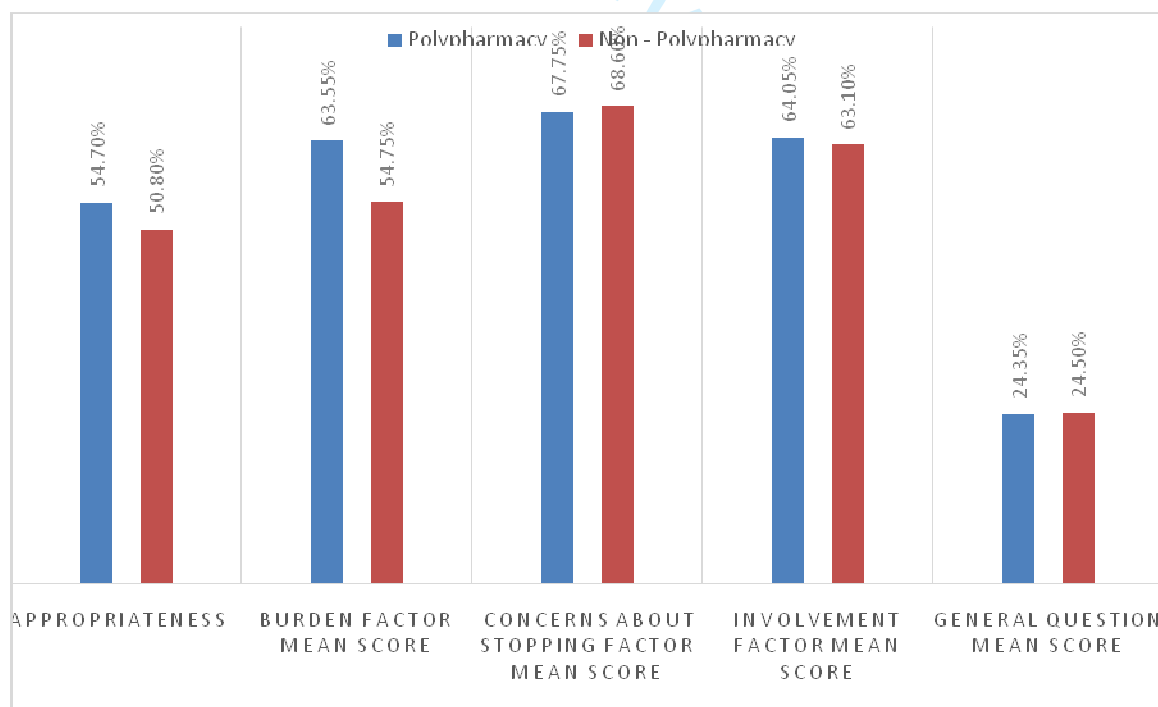

**Figure 1:** Percentage of the mean scores for rPATD sub scores

There was a significant difference among polypharmacy and non-polypharmacy in appropriateness factors overall score ( $10.94 \pm 1.98$  Vs.  $10.16 \pm 2.09$ ,  $P= 0.009$ ). There was also a significant difference among the two groups to the question “I would like my doctor to reduce the dose of one or more of my medicines” (mean score of  $2.48 \pm 1.13$  for polypharmacy groups and  $2.01 \pm 1.02$  for non – polypharmacy groups,  $P$  value=  $0.001$ ). Moreover, patients with polypharmacy had more burden than non – polypharmacy patients ( $12.71 \pm 2.58$  Vs.  $10.95 \pm 3.23$  respectively,  $P= < 0.0001$ ). (Table 2)

**Table 2:** Distribution of rPATD sub scores among study participants, UoGRTH, Ethiopia (n = 316).

| Variable                                                                      | Poly Pharmacy    |                  | P- Value           |
|-------------------------------------------------------------------------------|------------------|------------------|--------------------|
|                                                                               | Yes (n=62)       | No (n=253)       |                    |
| <b>Appropriateness Factor overall score</b>                                   | $10.94 \pm 1.98$ | $10.16 \pm 2.09$ | <b>0.009*</b>      |
| I feel that I may be taking one or more medicines that I no longer need       | $2.00 \pm 0.87$  | $1.90 \pm 0.97$  | 0.417              |
| I would like to try stopping one of my medicines to see how I feel without it | $1.31 \pm 0.69$  | $1.31 \pm 0.73$  | 0.955              |
| I would like my doctor to reduce the dose of one or more of my medicines      | $2.48 \pm 1.13$  | $2.01 \pm 1.02$  | <b>0.001*</b>      |
| I think one or more of my medicines may not be working                        | $2.90 \pm 0.43$  | $2.89 \pm 0.40$  | 0.811              |
| I believe one or more of my medicines may be currently giving me side effects | $2.24 \pm 1.02$  | $2.06 \pm 0.91$  | 0.191              |
| <b>Burden factor -overall score</b>                                           | $12.71 \pm 2.58$ | $10.95 \pm 3.23$ | <b>&lt;0.0001*</b> |
| I spent a lot of money to medicines                                           | $2.94 \pm 1.23$  | $2.78 \pm 1.24$  | 0.372              |
| Taking my medicines every day is very inconvenient                            | $2.37 \pm 0.96$  | $2.10 \pm 1.54$  | 0.191              |
| I feel that I am taking a large number of medicines                           | $2.84 \pm 0.94$  | $2.18 \pm 0.93$  | <b>&lt;0.0001*</b> |
| I feel that my medicines are a burden to me                                   | $2.45 \pm 0.86$  | $1.96 \pm 0.92$  | <b>&lt;0.0001*</b> |
| Sometimes I think I take too many medicines                                   | $2.11 \pm 0.96$  | $1.92 \pm 0.92$  | 0.152              |
| <b>Concerns about stopping Factor score</b>                                   | $13.55 \pm 2.12$ | $13.72 \pm 2.37$ | 0.612              |
| <b>Involvement Factor score</b>                                               | $12.81 \pm 3.25$ | $12.62 \pm 3.13$ | 0.671              |

1  
2  
3 **General Questions score** 4.87 ± 1.14 4.90 ± 1.11 0.868  
4

5 \*statistically significant (p<0.05)  
6  
7

8 The descriptive analysis of patients' response to each questions of rPATD questionnaire has been  
9 described in table 3.  
10  
11

12  
13 **Table 3:** Percentage distribution of patients' response to the survey questions, UoGRTH,  
14 Ethiopia (n = 316).  
15  
16

| 17 Survey questions                                                                 | 18 Strongly disagree | 19 Disagree | 20 Agree  | 21 Strongly agree |
|-------------------------------------------------------------------------------------|----------------------|-------------|-----------|-------------------|
| <b>Burden Factor</b>                                                                |                      |             |           |                   |
| 22 I Spent a lot of money to medicines                                              | 87(27)               | 15(4.7)     | 84(26.6)  | 130(41.1)         |
| 23 Taking my medicines every day is very inconvenient                               | 104(32.9)            | 92(29.1)    | 107(33.9) | 13(4.1)           |
| 24 I feel that I am taking a large number of medicine                               | 88(27.8)             | 68(21.5)    | 135(42.7) | 25(7.9)           |
| 25 I feel that my medicines are a burden to me                                      | 114(36.1)            | 80(25.4)    | 110(34.8) | 12(3.8)           |
| 26 Sometimes I think I take too many medicines                                      | 134(42.4)            | 69(21.8)    | 105(33.2) | 8(2.5)            |
| <b>Appropriateness Factor</b>                                                       |                      |             |           |                   |
| 27 I feel that I may be taking one or medicines that I no longer need               | 95(30.1)             | 12(3.8)     | 144(45.6) | 65(20.6)          |
| 28 I wants to stop and try one of my medicines to see how I feel without it         | 257(81.3)            | 29(9.2)     | 21(6.6)   | 9(2.8)            |
| 29 I would like my doctor to reduce the dose of one or more my medicines            | 104(32.9)            | 30(9.5)     | 133(42.1) | 49(15.5)          |
| 30 I think one or more of my medicines may not be working                           | 7(2.2)               | 24(7.6)     | 281(88.9) | 4(1.3)            |
| 31 I believe one or more of my medicines may be currently giving me side effects    | 121(38.3)            | 11(3.5)     | 114(36.1) | 70(22.2)          |
| <b>Concerns about stopping factor</b>                                               |                      |             |           |                   |
| 32 I not agree to stop the medicine which I took for a long period of time          | 109(34.5)            | 119(37.7)   | 65(20.6)  | 23(7.3)           |
| 33 If I stop one of the medicines which I take I believe that I will not be healthy | 9(2.8)               | 25(7.9)     | 122(38.6) | 160(50.6)         |
| 34 If there is a change in the medicine, I feel not happy                           | 87(27.5)             | 81(25.6)    | 132(41.8) | 16(5.1)           |
| 35 If my doctor wants to stop my medicines I feel that I am hopeless                | 146(46.2)            | 82(25.9)    | 63(19.9)  | 25(7.9)           |
| 36 I have a bad experience of medicine discontinuation before                       | 186(58.9)            | 47(14.9)    | 45(14.2)  | 38(12.0)          |
| <b>Involvement Factor</b>                                                           |                      |             |           |                   |
| 37 I have a good knowledge for each medicine that are prescribed for me             | 59(18.7)             | 44(13.9)    | 168(53.2) | 45(14.2)          |

1

2

3

4

5

6

7

8

9

10

11

12

13

14

15

16

17

18

19

20

21

22

23

24

25

26

27

28

29

30

31

32

33

34

35

36

37

38

39

40

41

42

43

44

45

46

47

48

49

50

51

52

53

54

55

56

57

58

59

60

|                                                                                              |           |           |           |           |
|----------------------------------------------------------------------------------------------|-----------|-----------|-----------|-----------|
| I have a good knowledge about my drug and I would document if there is any change on my drug | 114(36.1) | 126(39.9) | 65(20.6)  | 11(3.5)   |
| I am interested to know about the medicines                                                  | 71(22.5)  | 54(17.1)  | 162(51.3) | 29(9.2)   |
| I participate with my doctor when decisions are made on my drug                              | 32(10.1)  | 93(29.4)  | 165(52.2) | 26(8.2)   |
| I always ask my doctor /a pharmacist if there is any miss-understanding                      | 19(6.0)   | 40(12.7)  | 161(50.9) | 96(30.4)  |
| <b>General Questions</b>                                                                     |           |           |           |           |
| I agree to stop one of the medicines if my doctor ordered/asked me to stop                   | 22(7.0)   | 36(11.4)  | 74(23.4)  | 184(58.2) |
| I am very happy about the medicines which I am taking                                        | 9(2.8)    | 16(5.1)   | 120(38.0) | 171(54.1) |

Patients who are unable to read and write have 78.1% less to good attitude towards deprescribing as compared with those patients who are attending higher education; AOR [0.219(0.077-0.622), P-value= 0.004]. Increase by one medicine in patient's number of medications will result 1.2 increases to good attitude to deprescribing; AOR [1.211(1.026-1.430), P-value= 0.023].(Table 4)

Table 4: Binary logistic regression test for Attitude of elderly patients towards deprescribing at Gondar University Hospital, 2017 (N=316)

| Variable                  | Attitude to deprescribing |      | Crude OR           | p-value        | Adjusted OR        | p-value        |
|---------------------------|---------------------------|------|--------------------|----------------|--------------------|----------------|
|                           | Poor                      | Good |                    |                |                    |                |
| <b>Sex</b>                |                           |      |                    |                |                    | 0.938          |
| Male                      | 107                       | 66   | 1.388(0.868-2.219) | 0.171          | 0.979(0.570-1.681) |                |
| Female                    | 99                        | 44   | 1                  |                | 1                  |                |
| <b>Age</b>                |                           |      |                    | 0.175          |                    | 0.173          |
| 65-69                     | 86                        | 56   | 1.682(0.797-3.549) | 0.172          | 1.660(0.752-3.667) | 0.210          |
| 70-74                     | 65                        | 25   | 0.994(0.442-2.234) | 0.988          | 1.001(0.425-2.357) | 0.997          |
| 75-79                     | 24                        | 17   | 1.830(0.736-4.551) | 0.194          | 2.101(0.802-5.503) | 0.131          |
| ≥80                       | 31                        | 12   | 1                  |                | 1                  |                |
| <b>Educational status</b> |                           |      |                    | <b>0.000**</b> |                    | <b>0.002**</b> |
| Unable to read and write  | 149                       | 53   | 0.192(0.073-0.506) | <b>0.001**</b> | 0.219(0.077-0.622) | <b>0.004*</b>  |
| Primary school            | 34                        | 28   | 0.443(0.156-1.262) | 0.128          | 0.506(0.168-1.523) | 0.225          |
| Secondary school          | 16                        | 16   | 0.538(0.170-1.702) | 0.292          | 0.596(0.177-2.010) | 0.404          |
| Higher education          | 7                         | 13   | 1                  |                | 1                  |                |
| <b>Comorbidity</b>        |                           |      |                    | 0.251          |                    | 0.619          |
| Hypertension              | 57                        | 37   | 1.235(0.705-2.163) | 0.461          | 0.960(0.520-1.772) | 0.895          |
| Heart failure             | 18                        | 10   | 0.519(0.195-1.381) | 0.189          | 0.512(0.184-1.421) | 0.199          |
| Diabetes mellitus         | 17                        | 4    | 1.729(0.678-4.410) | 0.251          | 1.468(0.551-3.915) | 0.443          |
| Chronic kidney disease    | 17                        | 6    | 0.671(0.246-1.834) | 0.437          | 0.614(0.216-1.747) | 0.360          |
| Asthma                    | 10                        | 5    | 1.665(0.564-4.914) | 0.356          | 0.997(0.303-3.285) | 0.996          |

1  
2

|                                |    |    |                    |               |                    |               |
|--------------------------------|----|----|--------------------|---------------|--------------------|---------------|
| 3 Rheumatic heart disease      | 9  | 7  | 0.439(0.118-1.629) | 0.218         | 0.481(0.123-1.886) | 0.293         |
| 4 Others                       | 78 | 41 | 1                  |               | 1                  |               |
| 5 <b>Number of medications</b> |    |    | 1.180(1.013-1.375) | <b>0.034*</b> | 1.211(1.026-1.430) | <b>0.023*</b> |

7 \* P-value &lt; 0.05, \*\* p-value&lt;0.01

8 OR- Odds ratio

9

10

## 11 Discussion

12

13

14

15

16

17

18

19

20

21

22

23

24

25

26

27

28

29

30

31

32

33

34

35

36

37

38

39

40

41

42

43

44

45

46

47

48

49

50

51

52

53

54

55

56

57

58

59

60

Elderly patients are prone to multi-morbidity with high medication regimens complexity needing stopping of medications, a growing concept so called deprescribing [11]. Elderly patients receiving many medications with their underlined medical illness are vulnerable to re-hospitalization, drug induced complications and morbidity. Moreover, polypharmacy compromises patient adherence and lead to incur additional costs to manage unnecessary adverse outcomes [15-20]. Hence, mutual agreement between patients and clinical practitioners should be sought to optimize the elderly ‘patients’ medication regimen keeping with few numbers of medications [21]. To our knowledge, this is a first study to have been conducted on this study area in resource limited settings like Ethiopia.

The mean number of daily medications of elderly patients in this study was  $3.43 \pm 1.50$ . Findings from Kalogianis MJ et al. study conducted in Australia shows total number of medications per patient was  $14.6 \pm 5.3$ , which is a lot higher than our result [10]. The Australian study included all potential regular and complementary medicines which may explain the difference in average medications per patient.

Majority (81.6%) of the patients agreed to stop one of the medicines if their doctor ordered/asked them to stop. This is consistent with previous studies conducted by Mona et al [10] and Reeve et al [11] having 80% and 89% of patients’ willingness rate to stop their medicines, respectively. This previews the importance of proactive engagement of health care professionals in

1  
2  
3       deprescribing process for elderly patients and should discuss with their patients on how to  
4  
5       optimize and simplify the dosage regimens.  
6

7  
8       In our study, most of patients with polypharmacy had more concerns on appropriateness and  
9  
10       burden of the medications they took as compared with their non polypharmacy counterparts. This  
11  
12       shows patients on polypharmacy are more willing to have one of the medications deprescribed  
13  
14       owing to patients complain on appropriateness, having a large number of medicines, feeling of  
15  
16       medicines burden. In contrast, a study conducted in aged care facility highlighted that the desire  
17  
18       to stop medications was not influenced by the number of medicines taken [10]. This disparity  
19  
20       may be explained by number of medications being a pushing factor to deprescribing in our study.  
21  
22       As stated by various studies [10, 11, 22, 23], the variation might also be attributable to the  
23  
24       difference in study settings like aged care facility center and usual care in our study.  
25  
26

27  
28       Two third of patients believe that they spent a lot of money to medicines; one of the single most  
29  
30       indicator to patients medications burden. In this regard medications costs are contributing to the  
31  
32       patients to have positive attitude to deprescribing as they are willing to reduce one of the  
33  
34       medicines. Other study has reported that patients having to pay less for their medications would  
35  
36       influence their willingness to have medications deprescribed and paying more encourage  
37  
38       deprescribing [10]. It is always important to consider cost implications in therapeutic decision  
39  
40       making and drug selection in elderly patients as those patients are prone to prolonged care,  
41  
42       polypharmacy and less productivity to handle their therapeutic expenses [24].  
43  
44

45  
46       Majority of the respondents feel that they took at least one of the medicines neither needed  
47  
48       longer nor working anymore. Despite of this perception, elderly patients are solely dependent on  
49  
50       the physician decision and look to hear the likelihood of stopping the medicine from the doctor  
51  
52       side [11].  
53  
54

1  
2  
3 Overall attitude towards deprescribing is significantly related with only two of the predictor  
4 variables; educational status and the number of medications taken by the patients. Those who are  
5 not able to read and write had poor attitude towards deprescribing as compared with those who  
6 attended higher education. On the contrary, every increase in a number of medicines was  
7 associated with 21% increase to good attitude towards deprescribing. This is supported by one  
8 study; patient willingness to stop medication was correlated with a desire to take few medicines  
9 and the feeling of taking a large number of medications and being less comfortable with current  
10 medications [11].

11  
12 Majority of the elderly patients have curiosity to know about their medicines, ask their healthcare  
13 provider and involve in the clinical decision making process. This is very important to patient–  
14 provider relationships, encircling on the sub-themes of trust, relying on expertise and shared  
15 decision making which are imperative to better patient outcomes. In spite of these, majority of  
16 elderly patients do not have good knowledge of their medicines and merely dependent on the  
17 health care providers to initiate decisions about their medications. Moreover, many patients who  
18 have a preference to take fewer medicines do not share their beliefs with providers and waiting  
19 for provider initiated medication discontinuation [25]. Thus health professionals should use a  
20 patient centered approach to outweigh the risks and benefits of every medicine against the  
21 particular goals of the elderly patient, with the aim of minimizing the total number of prescribed  
22 medicines [26].

### 23 24 **Strengths and Limitations**

25  
26 This is the first study in Ethiopia to assess elderly patients' perception towards deprescribing and  
27 their willingness to stop medicines by using validated multidimensional questionnaire in  
28 relatively large number of patients. Despite of this, it is interviewer based questionnaire



1  
2  
3 structured for quantitative research, which does not permit in-depth investigation of patient  
4 attitude. The type of disease they have, the medicine category, type and duration of the  
5 medication might affect patients' willingness and perception towards deprescribing.  
6  
7  
8  
9

## 10 **Conclusion**

11 About 65.2% older patients have overall poor attitude toward discontinuing medications  
12 (deprescribing). However, they are willing to stop their medications if the doctor said it is  
13 possible. Most of the patients who are in polypharmacy doubt the necessity of all the medicines  
14 and feel that a lot of burden in terms of medication expenses. Polypharmacy was the common  
15 driving factor to patients' willingness to deprescribing. Elderly patients are found to be  
16 exclusively dependent on the clinician's decision to deprescribing. Therefore, health care  
17 providers should be proactive to discuss, evaluate and decision making of potentially in  
18 appropriate medications. Further study with potentially large number of study participants and  
19 qualitative study is warranted to fully evaluate the deprescribing attitude in different disease  
20 categories and prospective significance to Ethiopian elderly patients' health.  
21  
22  
23  
24  
25  
26  
27  
28  
29  
30  
31  
32  
33  
34  
35

36 **Acknowledgements** The authors acknowledge Akshaya Srikanth Bhagavathula for editing the  
37 manuscript.  
38  
39  
40

41 **Contributors** HGT has contributed to the conception, study design, prepared the study protocol  
42 and drafted the manuscript. YGT and DAE performed literature review, carried out statistical  
43 analyses, and interpreted the results. FC and YA acquired and managed the data. KTH, TBA,  
44 AAA wrote the manuscript and reviewed the manuscript for critical revisions. All authors  
45 approved the final manuscript.  
46  
47  
48  
49  
50  
51  
52  
53  
54  
55  
56  
57  
58  
59  
60

1  
2  
3 **Competing interests** None declared.  
4

5 **Patient consent** Obtained.  
6

7 **Ethics approval** Ethical committee of School of Pharmacy, University of Gondar  
8

9 **Provenance and peer review** not commissioned; externally peer reviewed.  
10

11 **Data sharing statement** No additional data are available  
12

## 13 **References**

- 14 1. Bushardt RL, Massey EB, Simpson TW, Ariail JC, Simpson KN. Polypharmacy:  
15 misleading, but manageable. *ClinInterv Aging*. 2008;3(2):383-389.  
16
- 17 2. Nebeker JR, Barach P, Samore MH. Clarifying adverse drug events: a clinician's guide to  
18 terminology, documentation, and reporting. *Ann Intern Med*. 2004;140(10):795-801.  
19
- 20 3. Gandhi TK, Weingart SN, Borus J, et al. Adverse drug events in ambulatory care. *N Engl J*  
21 *Med*. 2003;348(16):1556-1564.  
22
- 23 4. Scott IA, Hilmer SN, Reeve E, et al. Reducing inappropriate polypharmacy: the process of  
24 deprescribing. *JAMA Intern Med*. 2015;175(5):827-834.  
25 doi:10.1001/jamainternmed.2015.0324.  
26
- 27 5. Reeve E, Wiese MD. Benefits of deprescribing on patients' adherence to medications. *Int J*  
28 *Clin Pharm* 2014;36:26–9  
29
- 30 6. Center for national health development in Ethiopia.  
31 <http://cnhde.ei.columbia.edu/healthsystem>  
32
- 33 7. Iyer S, Naganathan V, McLachlan AJ, Le Couteur DG. Medication withdrawal trials in  
34 people aged 65 years and older: a systematic review. *Drugs Aging* 2008;25:1021–31  
35
- 36 8. Linsky A, Simon SR, Marcello TB, Bokhour B. Clinical provider perceptions of proactive  
37 medication discontinuation. *Am J Manag Care*. 2015;21(4):277-283  
38
- 39 9. Phillips LS, Branch WT, Cook CB, et al. Clinical inertia. *Ann Intern Med*. 2001;135(9):825-  
40 834  
41
- 42 10. Kalogianis MJ, Wimmer BC, Turner JP, et al. Are residents of aged care facilities willing to  
43 have their medications deprescribed? *Research in Social and Administrative Pharmacy* 12  
44 (2016) 784–788. <http://dx.doi.org/10.1016/j.sapharm.2015.12.004>.  
45  
46  
47  
48  
49  
50  
51  
52  
53  
54  
55  
56  
57  
58  
59  
60

11. Reeve E, Wiese M, Hendrix I, et al. People's attitudes, beliefs and experiences regarding polypharmacy and willingness to deprescribe. *J Am Geriatr Soc*. 2013;61:1508–1514
12. Qi K, Reeve E, Hilmer SN, Pearson S-A, Matthews S, Gnjidic D. Older peoples' attitudes regarding polypharmacy, statin use and willingness to have statins deprescribed in Australia. *Int J Clin Pharmacol*. 2015;37:949–957
13. Reeve E, Low LF, Shakib S, Hilmer SN. Development and validation of the revised Patients' Attitudes Towards Deprescribing (rPATD) Questionnaire: Versions for older adults and caregivers. *Drugs & aging*. 2016;33(12):913-28.
14. Horne R, Weinman J, Hankins M. The beliefs about medicines questionnaire: The development and evaluation of a new method for assessing the cognitive representation of medication. *Psychol Health* 1999;14:1–24.
15. World Health Organization. Adherence to long-term therapies: evidence for action [online] (2013) [cited 2017 on Sept 21].  
[http://www.who.int/chp/knowledge/publications/adherence\\_report/en/index.html](http://www.who.int/chp/knowledge/publications/adherence_report/en/index.html).
16. Hajjar ER, Cafiero AC, Hanlon JT. Polypharmacy in elderly patients. *Am J Geriatr Pharmacother*. 2007; 5(4):345–51.
17. Banning M. Medication management: older people and nursing. *Nurs Older People*. 2005; 17(7):20–3.
18. Frazier SC. Health outcomes and polypharmacy in elderly individuals. *J Gerontol Nurs*. 2005; 31(9):4–11.
19. Guthrie B, McCowan C, Davey P, Simpson CR, Dreischulte T, Barnett K. High risk prescribing in primary care patients particularly vulnerable to adverse drug events: cross sectional population database analysis in Scottish general practice. *BMJ*. 2011;21(342):d3514.
20. Giustini S, Thiry S. Medicinagenerale, multi morbilita` e politerapie in pazienti anziani. *Riv Soc Italiana di Med Gen*. 2012;6:11–4.
21. Patterson SM, Hughes C, Kerse N, Cardwell CR, Bradley MC. Interventions to improve the appropriate use of polypharmacy for Older people. *Cochrane Database Syst Rev* 2012; 5: Art. No.:CD008165
22. Reeve E, Shakib S, Hendrix I, et al. Review of deprescribing processes and development of an evidence-based, patient-centred deprescribing process. *Br J Clin Pharmacol* 2014;78: 738–747.

- 1  
2  
3 23. Alessandro Galazzi, Maura Lusignani, Maria Teresa Chiarelli, Pier MannuccioMannucci,  
4 Carlotta Franchi, Mauro Tettamanti, Emily Reeve, Alessandro Nobili. Attitudes towards  
5 polypharmacy and medication withdrawal among older inpatients in Italy. *Int J Clin Pharm*  
6 (2016) 38:454–461.  
7  
8  
9  
10 24. Garfinkel D, Zur-Gil S, Ben-Israel J. The war against polypharmacy: a new cost-effective  
11 geriatric-palliative approach for improving drug therapy in disabled elderly people. *Isr Med*  
12 *Assoc J* 2007;9:430–434  
13  
14  
15 25. Linsky A, Simon SR, Bokhour B. Patient perceptions of proactive medication  
16 discontinuation. *Patient Education and Counseling*.2015; 98: 220–225.  
17  
18 26. Page AT, Christopher D, Beer E, Rhonda MR, Sally B, Eames M, Potter K. Deprescribing  
19 in frail older people – Do doctors and pharmacists agree? *Research in Social and*  
20 *Administrative Pharmacy* 12 (2016) 438–449  
21  
22  
23  
24  
25  
26  
27  
28  
29  
30  
31  
32  
33  
34  
35  
36  
37  
38  
39  
40  
41  
42  
43  
44  
45  
46  
47  
48  
49  
50  
51  
52  
53  
54  
55  
56  
57  
58  
59  
60

STROBE 2007 (v4) Statement—Checklist of items that should be included in reports of *cross-sectional studies*

| Section/Topic             | Item # | Recommendation                                                                                                                                                                       | Reported on page # |
|---------------------------|--------|--------------------------------------------------------------------------------------------------------------------------------------------------------------------------------------|--------------------|
| Title and abstract        | 1      | (a) Indicate the study’s design with a commonly used term in the title or the abstract                                                                                               | yes                |
|                           |        | (b) Provide in the abstract an informative and balanced summary of what was done and what was found                                                                                  | yes                |
| <b>Introduction</b>       |        |                                                                                                                                                                                      |                    |
| Background/rationale      | 2      | Explain the scientific background and rationale for the investigation being reported                                                                                                 | yes                |
| Objectives                | 3      | State specific objectives, including any prespecified hypotheses                                                                                                                     | yes                |
| <b>Methods</b>            |        |                                                                                                                                                                                      |                    |
| Study design              | 4      | Present key elements of study design early in the paper                                                                                                                              | yes                |
| Setting                   | 5      | Describe the setting, locations, and relevant dates, including periods of recruitment, exposure, follow-up, and data collection                                                      | yes                |
| Participants              | 6      | (a) Give the eligibility criteria, and the sources and methods of selection of participants                                                                                          | yes                |
| Variables                 | 7      | Clearly define all outcomes, exposures, predictors, potential confounders, and effect modifiers. Give diagnostic criteria, if applicable                                             | yes                |
| Data sources/ measurement | 8*     | For each variable of interest, give sources of data and details of methods of assessment (measurement). Describe comparability of assessment methods if there is more than one group | Yes                |
| Bias                      | 9      | Describe any efforts to address potential sources of bias                                                                                                                            | Yes                |
| Study size                | 10     | Explain how the study size was arrived at                                                                                                                                            | Yes                |
| Quantitative variables    | 11     | Explain how quantitative variables were handled in the analyses. If applicable, describe which groupings were chosen and why                                                         | Yes                |
| Statistical methods       | 12     | (a) Describe all statistical methods, including those used to control for confounding                                                                                                | Yes                |
|                           |        | (b) Describe any methods used to examine subgroups and interactions                                                                                                                  | Yes                |
|                           |        | (c) Explain how missing data were addressed                                                                                                                                          | Yes                |
|                           |        | (d) If applicable, describe analytical methods taking account of sampling strategy                                                                                                   | Yes                |
|                           |        | (e) Describe any sensitivity analyses                                                                                                                                                | Yes                |
| <b>Results</b>            |        |                                                                                                                                                                                      |                    |

|                          |     |                                                                                                                                                                                                              |     |
|--------------------------|-----|--------------------------------------------------------------------------------------------------------------------------------------------------------------------------------------------------------------|-----|
| Participants             | 13* | (a) Report numbers of individuals at each stage of study—eg numbers potentially eligible, examined for eligibility, confirmed eligible, included in the study, completing follow-up, and analysed            | Yes |
|                          |     | (b) Give reasons for non-participation at each stage                                                                                                                                                         | NA  |
|                          |     | (c) Consider use of a flow diagram                                                                                                                                                                           | NA  |
| Descriptive data         | 14* | (a) Give characteristics of study participants (eg demographic, clinical, social) and information on exposures and potential confounders                                                                     | Yes |
|                          |     | (b) Indicate number of participants with missing data for each variable of interest                                                                                                                          | Yes |
| Outcome data             | 15* | Report numbers of outcome events or summary measures                                                                                                                                                         | Yes |
| Main results             | 16  | (a) Give unadjusted estimates and, if applicable, confounder-adjusted estimates and their precision (eg, 95% confidence interval). Make clear which confounders were adjusted for and why they were included | Yes |
|                          |     | (b) Report category boundaries when continuous variables were categorized                                                                                                                                    | Yes |
|                          |     | (c) If relevant, consider translating estimates of relative risk into absolute risk for a meaningful time period                                                                                             | Yes |
| Other analyses           | 17  | Report other analyses done—eg analyses of subgroups and interactions, and sensitivity analyses                                                                                                               | NA  |
| <b>Discussion</b>        |     |                                                                                                                                                                                                              | Yes |
| Key results              | 18  | Summarise key results with reference to study objectives                                                                                                                                                     | Yes |
| Limitations              | 19  | Discuss limitations of the study, taking into account sources of potential bias or imprecision. Discuss both direction and magnitude of any potential bias                                                   | Yes |
| Interpretation           | 20  | Give a cautious overall interpretation of results considering objectives, limitations, multiplicity of analyses, results from similar studies, and other relevant evidence                                   | Yes |
| Generalisability         | 21  | Discuss the generalisability (external validity) of the study results                                                                                                                                        | Yes |
| <b>Other information</b> |     |                                                                                                                                                                                                              | Yes |
| Funding                  | 22  | Give the source of funding and the role of the funders for the present study and, if applicable, for the original study on which the present article is based                                                | NA  |

Abb: NA- Not applicable

\*Give information separately for cases and controls in case-control studies and, if applicable, for exposed and unexposed groups in cohort and cross-sectional studies.

**Note:** An Explanation and Elaboration article discusses each checklist item and gives methodological background and published examples of transparent reporting. The STROBE checklist is best used in conjunction with this article (freely available on the Web sites of PLoS Medicine at <http://www.plosmedicine.org/>, Annals of Internal Medicine at <http://www.annals.org/>, and Epidemiology at <http://www.epidem.com/>). Information on the STROBE Initiative is available at [www.strobe-statement.org](http://www.strobe-statement.org).

# BMJ Open

## Older patients' perception to Deprescribing in resource limited settings: A cross sectional study in an Ethiopia University Hospital.

|                                 |                                                                                                                                                                                                                                                                                                                                                                                                                                                                                                                                                                                                 |
|---------------------------------|-------------------------------------------------------------------------------------------------------------------------------------------------------------------------------------------------------------------------------------------------------------------------------------------------------------------------------------------------------------------------------------------------------------------------------------------------------------------------------------------------------------------------------------------------------------------------------------------------|
| Journal:                        | <i>BMJ Open</i>                                                                                                                                                                                                                                                                                                                                                                                                                                                                                                                                                                                 |
| Manuscript ID                   | bmjopen-2017-020590.R1                                                                                                                                                                                                                                                                                                                                                                                                                                                                                                                                                                          |
| Article Type:                   | Research                                                                                                                                                                                                                                                                                                                                                                                                                                                                                                                                                                                        |
| Date Submitted by the Author:   | 03-Jan-2018                                                                                                                                                                                                                                                                                                                                                                                                                                                                                                                                                                                     |
| Complete List of Authors:       | Tegegn, Henok; University of Gondar, Clinical Pharmacy<br>Tefera, Yonas; University of Gondar, Clinical pharmacy<br>Erku, Daniel ; University of Gondar, Clinical Pharmacy<br>Haile, Kaleab ; University of Gondar, Pharmaceutics and Social Pharmacy<br>Abebe, Tamrat; University of Gondar, Clinical Pharmacy; Karolinska<br>Institute, Department of Learning, Informatics, Management and Ethics<br>(LIME)<br>Chekol, Fasil; University of Gondar, Clinical Pharmacy<br>azanaw, yonas ; University of Gondar, Clinical Pharmacy<br>Ayele, Asnakew ; University of Gondar, Clinical Pharmacy |
| <b>Primary Subject Heading</b>: | Geriatric medicine                                                                                                                                                                                                                                                                                                                                                                                                                                                                                                                                                                              |
| Secondary Subject Heading:      | Medical management, Patient-centred medicine, Communication, General practice / Family practice                                                                                                                                                                                                                                                                                                                                                                                                                                                                                                 |
| Keywords:                       | Attitude, medication discontinuation, Deprescribing, Polypharmacy, elderly, rPATD                                                                                                                                                                                                                                                                                                                                                                                                                                                                                                               |
|                                 |                                                                                                                                                                                                                                                                                                                                                                                                                                                                                                                                                                                                 |

SCHOLARONE™  
Manuscripts

1  
2  
3 **Older patients' perception to Deprescribing in resource limited settings: A cross sectional**  
4  
5 **study in an Ethiopia University Hospital.**  
6

7 Henok Getachew Tegegn<sup>1</sup>, Yonas Getaye Tefera<sup>1</sup>, Daniel Asfaw Erku<sup>1</sup>, Kaleab Taye Haile<sup>3</sup>,  
8 Tamrat Befekadu Abebe<sup>1,2</sup>, Fasil Chekol<sup>1</sup>, Yonas Azanaw<sup>1</sup>, Asnakew Achaw Ayele<sup>1</sup>  
9

10  
11 <sup>1</sup>Department of Clinical Pharmacy, University of Gondar, Gondar, Amhara, Ethiopia  
12

13 <sup>2</sup> Masters program in health economics, policy and management; Student; Department of  
14 Learning, Informatics, Management and Ethics (LIME); Karolinska Institute; Solna; Sweden  
15

16 <sup>3</sup>Department of Pharmaceutics and Social Pharmacy, University of Gondar, Gondar, Amhara,  
17 Ethiopia  
18

19  
20  
21  
22  
23  
24  
25  
26  
27  
28  
29  
30  
31 **CORRESPONDING AUTHOR**

32 Henok Getachew Tegegn (BPharm, MSc)

33 Assistant Professor of Clinical Pharmacy

34 Clinical Pharmacy Department, School of Pharmacy, University of Gondar, Ethiopia

35 P.O. Box: 196, Gondar, Ethiopia

36 Tel: +251911438077

37 Email Address: [heniget@gmail.com](mailto:heniget@gmail.com)  
38  
39  
40  
41  
42  
43  
44  
45  
46  
47  
48  
49  
50  
51  
52  
53  
54  
55  
56  
57  
58  
59  
60



## Abstract

**Objectives:** We assessed whether socio-demographic and clinical data were associated with older patients' attitude towards deprescribing of inappropriate medications.

**Design** This was Institutional-based quantitative cross-sectional survey.

**Setting** Data collection was conducted the outpatient clinics of University of Gondar referral and teaching hospital (UoGRTH) in Ethiopia.

**Participants** Older patients aged 65 or greater with at least one medication were enrolled in the study from March 1 to June 30, 2017. Exclusion criteria were patients who had severe physical or psychological problems and those who refused to participate. Of 351 eligible participants, 316 elderly patients completed the survey data.

**Main outcome measures:** Older patients' attitude towards deprescribing was measured using the validated tool of revised Patients' Attitudes towards Deprescribing (rPATD) for older patients. Predictive variables were Sociodemographic and clinical data such as comorbidity and polypharmacy. Older patients' willingness to deprescribing was an interest of outcome.

**Results** Of 316 older patients enrolled in this study, 54.7 % were men; the median number of their daily medications was 3 (IQR: 2-4). Most of the participants (81.6%; 95CI: 77%-86%) were willing to stop one or more of their medications if advised by doctor even if a significant number of participants were overall satisfied with medications they were taking (92.1%; 95CI: 89%-95%). This willingness was correlated with seven items of the rPATD including strong correlation with overall satisfaction of patients with their medication taken.

**Conclusion:** Most of the participants (81.6%) were still willing to reduce one or more of their medications if advised by their doctor. Health care providers should be proactive to discuss, evaluate and decision making of potentially inappropriate medications.

Key words: Attitude; medication discontinuation; Deprescribing; Polypharmacy; Elderly; rPATD

### Strengths and limitations of this study

- Older patients' attitude towards deprescribing and their willingness to stop medicines has been assessed for the first time in resource limited setting like Ethiopia
- This study utilized a validated multidimensional questionnaire in relatively large number of patients.
- The validated tool of rPATD however, has not been tested in a culturally different settings like Ethiopia
- Owing to the interviewer based questionnaire structured for quantitative research, it does not permit in-depth investigation of patient attitude.
- Care givers for older patients have not been included in the current study as they may affect on the preference and willingness to stop medicines.

### Introduction

Polypharmacy often defined as the practice of prescribing five or more medications to the same person, has been linked with pervasive adverse drug events and ultimately leads to increased morbidity, mortality and healthcare costs [1-3]. Polypharmacy-related adverse drug events (ADEs) are very common and estimated to occur in 25% of ambulatory care patients [3]. Deprescribing, one of the approaches to prevent polypharmacy-related ADEs, is defined as the 'the process of withdrawal of inappropriate medication, supervised by a health care professional with the goal of managing polypharmacy and improving outcomes' [4]. Given the holistic and patient-centered nature of deprescribing, it has a number of benefits to the patient. A recent systematic review conducted by Page et al. reported that individualized deprescribing interventions to reduce inappropriate polypharmacy may improve mortality [5]. Deprescribing also has potentially additional benefits to the patient such as increasing patient engagement in

1  
2  
3 medication therapy management and improving adherence possibly through reducing  
4 polypharmacy [6].  
5  
6

7  
8 The impact of deprescribing is conceivably beneficial for older patients living in resource limited  
9 countries such as Ethiopia, where the incidence of chronic non-communicable diseases and  
10 multimorbidity is mounting in alarming rate [7]. Moreover, the main source of drug expenditure  
11 in Ethiopian patients' out of pocket money and a significant percentage of the population  
12 purchase medicines from private drug retail outlets, which are usually not affordable by patients  
13  
14  
15  
16  
17  
18  
19 [8].  
20

21 While concepts such as adherence and medication reconciliation receive considerable attention,  
22 and covered by a wide range of literatures worldwide, little attention has been given to the  
23 concept of deprescribing and reduction of inappropriate polypharmacy [9]. Despite the  
24 prescribers' positive attitude on deprescribing [10], many factors including clinical uncertainty  
25 and shared responsibility with other healthcare providers severely impede clinicians' ability to  
26 proactively discontinue medications [11]. Moreover, patient perspectives on deprescribing and  
27 their communication with clinicians are equally important in evidence based medication  
28 discontinuation process. Several studies conducted in developed countries regarding older  
29 people's attitudes toward deprescribing reported a higher rate of willingness to discontinue their  
30 medications [12-16]. However, no previous study has explored the attitudes of Ethiopian older  
31 patients regarding their medications and deprescribing. It is also uncertain how patients would  
32 respond to a suggestion from a clinician to intentionally discontinue a medication. Taking the  
33 global evidence into consideration and due to lack of data in Ethiopia, we sought to identify  
34  
35  
36  
37  
38  
39  
40  
41  
42  
43  
44  
45  
46  
47  
48  
49  
50  
51  
52  
53  
54  
55  
56  
57  
58  
59  
60  
Ethiopian older patients' willingness to have their medications deprescribed.

## Methods

### Study design and setting

Institutional-based quantitative cross-sectional survey was conducted from March 1 to June 30, 2017 at University of Gondar referral and teaching hospital (UoGRTH), Ethiopia. The hospital is located in Gondar town, northwest Ethiopia, 738km away from Addis Ababa and it's the only referral and teaching center in the area to which majority of patients with chronic diseases including hypertension, diabetes mellitus, cancer and asthma are referred.

### Participants

All older patients ( $\geq 65$  years) who has been taking at least one medication regardless of their diagnosis and who visited the outpatient clinic of University of Gondar referral and teaching hospital (UoGRTH) for follow-up and medication refill were our study population. Patients who had severe physical or psychological problems which leads to inability to complete the interview and those who refused to participate were excluded from the survey. Of 351 eligible participants obtained during the study period, 316 elderly patients completed the survey data.

**Main outcome measures:** Older patients' attitude towards deprescribing was measured using the validated tool of revised Patients' Attitudes towards Deprescribing (rPATD) for older patients. Predictive variables were Sociodemographic and clinical data such as comorbidity and polypharmacy. Older patients' willingness to deprescribing was an interest of outcome.

### Survey instrument

Data was collected by three of the principal investigators through interviewer-administered questionnaire. The investigators were properly trained on the instrument and ways of approaching the patients and securing their permission for interview prior to the data collection process. We used Revised Patients' Attitudes towards Deprescribing (rPATD) questionnaire

[17]. It is a validated multidimensional questionnaire which measure patients' attitudes, knowledge and experiences related to medication discontinuation. The original a 5-point Likert scale in rPATD questionnaire, was changed to a 4-point Likert scale (strongly agree, agree, disagree and strongly disagree) in the current study as it may allow the participants to be more discriminating and avoid misinterpretation of mid points. The rPATD questionnaire has four major factors including Burden factor (5 items); Appropriateness factor (5 items); Concerns about stopping factor (5 items); Involvement factor (5 items) and additional two global questions are also considered. The previously validated tool -Belief in Medicine use Questionnaire (BMQ)-Overuse [18] was utilized for comparison and validation of the rPATD questionnaire. The questionnaire, first prepared in English, was translated to Amharic language and back to English so as to ensure that the translated version gives the proper meaning. It was further pre-tested on 25 elderly patients, who were not included in the final analysis, and slight modifications were instituted before the commencement of the actual survey. Polypharmacy was defined as the use of  $\geq 5$  regular medications.

### **Statistical analysis**

All the statistical analyses were done using Statistical Package for Social Sciences (SPSS) software version 21.0 for Windows (SPSS Inc., Chicago, IL) [19]. Frequencies and percentages were used to express different variables. Data were screened for normality using both the Shapiro–Wilk and Kolmogorov-Smirnov. Respondents were stratified by polypharmacy status to examine attitudes toward deprescribing in patients with polypharmacy.

Correlation analysis using Spearman's Rho, was used to assess the associations between all rPATD items and three individual questions like Patients' perception of side effect from their medicines, the patients' willingness to discontinue their medications if advised by doctor, and

1  
2  
3 Overall satisfaction of patients with their medication taken. Binary logistic regression was  
4 performed to assess the association between willingness to stop medication if advised by doctors  
5 and predictor variables. In Univariate analysis, variables with  $P < 0.2$  were selected for final  
6 model. But none of the variables fit these criteria. The level of statistical significance was  
7 defined as  $p < 0.05$  and all tests were two-tailed.  
8  
9  
10  
11  
12  
13

### 14 15 **Operational definitions:**

16  
17 Deprescribing: is 'the process of withdrawal of inappropriate medication, supervised by a health  
18 care professional with the goal of managing polypharmacy and improving outcomes'. It is the  
19 planned and supervised process of dose reduction or stopping of medication that might be  
20 causing harm or might not be longer providing benefit.  
21  
22  
23  
24  
25

26  
27 Poly pharmacy: is defined as the practice of prescribing five or more medications to the same  
28 person.  
29  
30  
31

### 32 33 **Ethical Consideration**

34  
35 This study was approved by the Ethical committee of School of Pharmacy, University of Gondar  
36 with an approval number of UoG-SoP-131/2017. Written informed consent from the respondents  
37 was also obtained before conducting this study. Participants' information obtained was kept  
38 confidential.  
39  
40  
41  
42  
43

### 44 45 **Results**

46  
47 Out of 351 patients approached, 316 of them completed the questionnaire, giving a response rate  
48 of 90 %. The median age was 70 years (IQR: 67-75). The mean and median number of their  
49 daily medications was  $3.43 \pm 1.50$  and 3 (IQR: 2-4), respectively. From the total number of  
50 participants, 62 (19.7%) were on polypharmacy. The most common reason of hospital visit in  
51  
52  
53  
54  
55  
56  
57  
58  
59  
60

polypharmacy groups were diabetes mellitus (DM), hypertension, and Rheumatic heart Disease (RHD). While in non – polypharmacy study participants, hypertension, DM and heart failure were more prominent. A detail of socio characteristics of the study participants is tabulated in Table 1.

**Table 1:** Sociodemographic and clinical characteristics of study participants, (n = 316).

| Variable                                                                | Participants, N (%)  | Polypharmacy n (%) |                       |
|-------------------------------------------------------------------------|----------------------|--------------------|-----------------------|
|                                                                         |                      | Yes (n=62)         | No (n=254)            |
| <b>Gender</b>                                                           |                      |                    |                       |
| Male                                                                    | 173(54.7)            | 35 (56.45 %)       | 138 (54.55 %)         |
| Female                                                                  | 143 (45.3)           | 27 (43.55%)        | 116 (45.45%)          |
| <b>Age(median; Interquartile range(IQR))</b>                            | 70(67-75)            | 70(67-73)          | 70(67-75)             |
| <b>Educational status</b>                                               |                      |                    |                       |
| Unable to read and to write                                             | 202 (64)             | 37 (59.68 %)       | 165 (65.2 %)          |
| Primary school                                                          | 62 (19.6)            | 13 (20.97 %)       | 49 (19.37 %)          |
| Secondary School                                                        | 32 (10.1)            | 5 (8.06 %)         | 26 (10.28 %)          |
| Higher education                                                        | 20 (6.3)             | 7 (11.29 %)        | 13 (5.14 %)           |
| <b>Reason of hospital visit (N=315)</b>                                 |                      |                    |                       |
| Hypertension                                                            | 128(40.5)            | 20 (32.3%)         | 108 (42.5)            |
| Heart failure                                                           | 23(7.3)              | 8 (1.3%)           | 15 (5.9)              |
| Diabetes Mellitus                                                       | 105(33.2)            | 22 (35.5%)         | 83 (32.7)             |
| Chronic kidney disease                                                  | 14(4.4)              | 1 (1.6%)           | 13 (5.1)              |
| Asthma                                                                  | 8 (2.5)              | 2 (3.2%)           | 6 (2.4)               |
| Rheumatoid Heart Disease                                                | 10(3.2)              | 4 (6.5%)           | 6 (2.4)               |
| Others                                                                  | 27(8.6) <sup>a</sup> | 5 (8.1%)           | 22 (9.1) <sup>a</sup> |
| <b>Charlson Comorbidity index <sup>a</sup><br/>(median;IQR) (N=315)</b> | 2(1-2)               | 2(2-3)             | 2(1-2)                |
| <b>Number of Medication (median;IQR)</b>                                | 3(2-4)               | 5(5-6)             | 3(2-3)                |

Note: <sup>a</sup> data was missing for one participant

As reported in table 2, a total of 316 participants have responded to 22 rPATD questions. In a burden factor domain, a total of 214 older patients (67.7%; 95%CI: 63%-73%) taught they spend a lot of money on their medicines. However, a considerable percentage of participants (61.5%) didn't feel their medications are a burden to them. Appropriateness factor domain showed that only 9.4% would like to try stopping one of their medications to see how they feel without it,

1  
2  
3 even though most of the participants (90.2%) thought one or more of their medicines may not be  
4 working.. Concerns about stopping factor; most of the respondents (89.2%; 95CI: 86%-93%)  
5 would be worried about missing out on future benefits if one of their medications was stopped..  
6  
7 In the involvement factor, majority of the respondents [257 participants; 81.3%;95CI: (77%-  
8 86%)] ask their doctor, pharmacist or other health care professional if there is any miss-  
9 understanding about their medications. If ordered by the doctor, about 258 individuals (81.6%;  
10 95CI: 77%-86%) were willing to stop one or more of their regular medications although a  
11 significant number of participants were overall satisfied with medications they were taking  
12 (92.1%; 95CI: 89%-95%) (Table 2).  
13  
14  
15  
16  
17  
18  
19  
20  
21  
22  
23

24 Patients' perception of side effect from their medicines is positively associated the thirteen items  
25 but negatively associated with the three factors. Those patients who thought their medications are  
26 a burden to them are more likely to perceive side effects from one or more medications. Patients  
27 didn't have overall satisfaction with their medications if they perceive side effect from one or  
28 more of the medications (table 3).  
29  
30  
31  
32  
33  
34  
35  
36

37 The patients' willingness to discontinue their medications if advised by doctor was correlated  
38 with seven items of the rPATD. Of the three items positively associated with this question,  
39 patients are still willing to stop one or more of their medications if advised by doctor even though  
40 they may be worried about missing out on future benefits while stopping one of their medications.  
41  
42 In contrary, four of the items were negatively correlated with willingness to discontinue their  
43 medications if advised by doctor such as belief that participants were taking too many medicines,  
44 were perceiving side effects from one or more of their medicines, were reluctant to stop a  
45 medication taken for a long time, and perceived their doctor giving up on them If their doctor  
46  
47  
48  
49  
50  
51  
52  
53  
54  
55  
56  
57  
58  
59  
60



recommended stopping a medicine. Overall satisfaction of patients with their medication taken was correlated with many items of rPATD questionnaire as described in detail in Table 3.

**Table 2:** Patients' attitudes towards deprescribing based on the rPATD questionnaire (n = 316).

| Survey questions                      | Strongly disagree                                                                          | Disagree  | Agree     | Strongly agree | Strongly agree/ Agree % (95% CI) |                 |
|---------------------------------------|--------------------------------------------------------------------------------------------|-----------|-----------|----------------|----------------------------------|-----------------|
| <b>Burden Factor</b>                  |                                                                                            |           |           |                |                                  |                 |
| B1                                    | I spent a lot of money on my medicines                                                     | 87(27)    | 15(4.7)   | 84(26.6)       | 130(41.1)                        | 67.7% (63-73)   |
| B2                                    | Taking my medicines every day is very inconvenient                                         | 104(32.9) | 92(29.1)  | 107(33.9)      | 13(4.1)                          | 38% (32.6-43.4) |
| B3                                    | I feel that I am taking a large number of medicine                                         | 88(27.8)  | 68(21.5)  | 135(42.7)      | 25(7.9)                          | 50.6% (45-56)   |
| B4                                    | I feel that my medicines are a burden to me                                                | 114(36.1) | 80(25.4)  | 110(34.8)      | 12(3.8)                          | 38.6% (33-44)   |
| B5                                    | Sometimes I think I take too many medicines                                                | 134(42.4) | 69(21.8)  | 105(33.2)      | 8(2.5)                           | 35.7% (30-41)   |
| <b>Appropriateness Factor</b>         |                                                                                            |           |           |                |                                  |                 |
| A1                                    | I feel that I may be taking one or medicines that I no longer need                         | 144(45.6) | 65(20.6)  | 95(30.1)       | 12(3.8)                          | 33.9% (29-39)   |
| A2                                    | I would like to try stopping one of my medicines to see how I feel without it              | 257(81.3) | 29(9.2)   | 21(6.6)        | 9(2.8)                           | 9.4% (6-13)     |
| A3                                    | I would like my doctor to reduce the dose of one or more my medicines                      | 133(42.1) | 49(15.5)  | 104(32.9)      | 30(9.5)                          | 42.4% (37-48)   |
| A4                                    | I think one or more of my medicines may not be working                                     | 7(2.2)    | 24(7.6)   | 281(88.9)      | 4(1.3)                           | 90.2% (87-93)   |
| A5                                    | I believe one or more of my medicines may be currently giving me side effects              | 114(36.1) | 70(22.2)  | 121(38.3)      | 11(3.5)                          | 41.8% (36-47)   |
| <b>Concerns about stopping factor</b> |                                                                                            |           |           |                |                                  |                 |
| C1                                    | I would be reluctant to stop a medicine that I had been taking for a long time             | 109(34.5) | 119(37.7) | 65(20.6)       | 23(7.3)                          | 27.9% (23-33)   |
| C2                                    | If one of my medicines was stopped I would be worried about missing out on future benefits | 9(2.8)    | 25(7.9)   | 122(38.6)      | 160(50.6)                        | 89.2% (86-93)   |
| C3                                    | I get stressed whenever changes are made to my medicines                                   | 87(27.5)  | 81(25.6)  | 132(41.8)      | 16(5.1)                          | 46.9% (41-52)   |
| C4                                    | If my doctor recommended stopping a medicine I would feel that he/she was giving up on me  | 146(46.2) | 82(25.9)  | 63(19.9)       | 25(7.9)                          | 27.8% (23-33)   |
| C5                                    | I have a bad experience when stopping a medicine before                                    | 186(58.9) | 47(14.9)  | 45(14.2)       | 38(12.0)                         | 26.5% (21-31)   |
| <b>Involvement Factor</b>             |                                                                                            |           |           |                |                                  |                 |

|                          |                                                                                                                                  |           |           |           |           |               |
|--------------------------|----------------------------------------------------------------------------------------------------------------------------------|-----------|-----------|-----------|-----------|---------------|
| I1                       | I have a good understanding of the reasons I was prescribed each of my medicines                                                 | 59(18.7)  | 44(13.9)  | 168(53.2) | 45(14.2)  | 67.4% (62-73) |
| I2                       | I know exactly what medicines I am currently taking, and/or I keep an up to date list of my medicines                            | 114(36.1) | 126(39.9) | 65(20.6)  | 11(3.5)   | 24.1% (19-29) |
| I3                       | I like to know as much as possible about my medicines                                                                            | 71(22.5)  | 54(17.1)  | 162(51.3) | 29(9.2)   | 60.5% (55-66) |
| I4                       | I like to be involved in making decisions about my medicines with my doctors                                                     | 32(10.1)  | 93(29.4)  | 165(52.2) | 26(8.2)   | 60.4% (55-66) |
| I5                       | I always ask my doctor, pharmacist or other health care professional if there is something I don't understand about my medicines | 19(6.0)   | 40(12.7)  | 161(50.9) | 96(30.4)  | 81.3% (77-86) |
| <b>General Questions</b> |                                                                                                                                  |           |           |           |           |               |
| G1                       | If my doctor said it was possible I would be willing to stop one or more of my regular medicines                                 | 22(7.0)   | 36(11.4)  | 74(23.4)  | 184(58.2) | 81.6% (77-86) |
| G2                       | Overall, I am satisfied with my current medicines                                                                                | 9(2.8)    | 16(5.1)   | 120(38.0) | 171(54.1) | 92.1% (89-95) |

Adopted from Revised Patients' Attitudes Towards Deprescribing (rPATD) Questionnaire (17)

Binary logistic regression was performed after dichotomizing the two outcome variables (willingness to deprescribe one or more of their regular medications if advised by doctor and overall satisfaction with their prescribed medications), but none of the variables fits the final model ( $P > 0.2$ ). And all variables didn't have statistically significant association with both outcome variables.

Table 3. Spearman Correlation of responses within the rPATD questionnaire

| rPATD questions<br>Spearman Correlation<br>( <i>p</i> -value)                                 | 10.I believe one or more of my<br>medicines may be currently<br>giving me side effects | 21. If my doctor said it<br>was possible I would be<br>willing to stop one or<br>more of my regular<br>medicines | 22.Overall, I am<br>satisfied with my<br>current medicines |
|-----------------------------------------------------------------------------------------------|----------------------------------------------------------------------------------------|------------------------------------------------------------------------------------------------------------------|------------------------------------------------------------|
| <b>Burden Factor</b>                                                                          |                                                                                        |                                                                                                                  |                                                            |
| 1. I spend a lot of money on my medicines                                                     | 0.03,0.63                                                                              | 0.14, 0.06                                                                                                       | <b>0.16, 0.00</b>                                          |
| 2.Taking my medicines every day is very inconvenient                                          | <b>0.24,0.00</b>                                                                       | -0.07, 0.19                                                                                                      | <b>-0.28,0.00</b>                                          |
| 3.I feel that I am taking a large number of medicine                                          | <b>0.15,0.01</b>                                                                       | -0.096,0.09                                                                                                      | <b>-0.35, 0.00</b>                                         |
| 4.I feel that my medicines are a burden to me                                                 | <b>0.31,0.00</b>                                                                       | -0.08, 0.17                                                                                                      | <b>-0.35,0.00</b>                                          |
| 5.Sometimes I think I take too many medicines                                                 | <b>0.25,0.00</b>                                                                       | <b>-0.22, 0.00</b>                                                                                               | <b>-0.53,0.00</b>                                          |
| <b>Appropriateness Factor</b>                                                                 |                                                                                        |                                                                                                                  |                                                            |
| 6.I feel that I may be taking one or medicines that I no longer need                          | <b>0.25,0.00</b>                                                                       | -0.09, 0.13                                                                                                      | <b>-0.38,0.00</b>                                          |
| 7. I would like to try stopping one of my medicines to see how I feel without it              | 0.06,0.32                                                                              | -0.04, 0.48                                                                                                      | -0.1,0.42                                                  |
| 8.I would like my doctor to reduce the dose of one or more my medicines                       | <b>0.14,0.02</b>                                                                       | 0.04,0.4                                                                                                         | <b>-0.25,0.001</b>                                         |
| 9.I think one or more of my medicines may not be working                                      | <b>-0.11,0.04</b>                                                                      | 0.01,0.8                                                                                                         | <b>0.14,0.009</b>                                          |
| 10.I believe one or more of my medicines may be currently giving me side effects              | 1                                                                                      | <b>-0.14,0.08</b>                                                                                                | <b>-0.31,0.00</b>                                          |
| <b>Concerns about stopping factor</b>                                                         |                                                                                        |                                                                                                                  |                                                            |
| 11.I would be reluctant to stop a medicine that I had been taking for a long time             | <b>0.19,0.001</b>                                                                      | <b>-0.3,0.00</b>                                                                                                 | <b>-0.26,0.001</b>                                         |
| 12.If one of my medicines was stopped I would be worried about missing out on future benefits | <b>-0.20,0.00</b>                                                                      | <b>0.26,0.00</b>                                                                                                 | <b>0.55,0.00</b>                                           |
| 13.I get stressed whenever changes are made to my medicines                                   | <b>0.27,0.00</b>                                                                       | -0.07,0.19                                                                                                       | <b>-0.17,0.002</b>                                         |
| 14.If my doctor recommended stopping a medicine I would feel that he/she was giving up on me  | <b>0.12,0.03</b>                                                                       | <b>-0.37, 0.00</b>                                                                                               | <b>-0.34,0.00</b>                                          |
| 15.I have a bad experience when stopping a                                                    | <b>0.19,0.001</b>                                                                      | -0.07,0.22                                                                                                       | <b>-0.18,0.027</b>                                         |

|    |                                                    |                    |                   |                   |
|----|----------------------------------------------------|--------------------|-------------------|-------------------|
| 1  | medicine before                                    |                    |                   |                   |
| 2  |                                                    |                    |                   |                   |
| 3  |                                                    |                    |                   |                   |
| 4  | <b>Involvement Factor</b>                          |                    |                   |                   |
| 5  | 16.I have a good understanding of the reasons I    | <b>0.14,0.01</b>   | 0.04,0.53         | 0.02,0.74         |
| 6  | was prescribed each of my medicines                |                    |                   |                   |
| 7  | 17.I know exactly what medicines I am currently    | <b>0.12,0.03</b>   | -0.02,0.71        | -0.001,0.98       |
| 8  | taking, and/or I keep an up to date list of my     |                    |                   |                   |
| 9  | medicines                                          |                    |                   |                   |
| 10 | 18.I like to know as much as possible about my     | <b>0.18, 0.001</b> | -0.08,0.14        | -0.11,0.175       |
| 11 | medicines                                          |                    |                   |                   |
| 12 | 19.I like to be involved in making decisions about | -0.01,0.79         | -0.01,0.81        | 0.065,0.45        |
| 13 | my medicines with my doctors                       |                    |                   |                   |
| 14 | 20.I always ask my doctor, pharmacist or other     | 0.05,0.36          | <b>0.13, 0.02</b> | <b>0.18,0.032</b> |
| 15 | health care professional if there is something I   |                    |                   |                   |
| 16 | don't understand about my medicines                |                    |                   |                   |
| 17 |                                                    |                    |                   |                   |
| 18 |                                                    |                    |                   |                   |
| 19 | <b>General Questions</b>                           |                    |                   |                   |
| 20 | 21.If my doctor said it was possible I would be    | -0.14,0.08         | 1                 | <b>0.34,0.00</b>  |
| 21 | willing to stop one or more of my regular          |                    |                   |                   |
| 22 | medicines                                          |                    |                   |                   |
| 23 | 22. Overall, I am satisfied with my current        | <b>-0.31,0.00</b>  | <b>0.34, 0.00</b> | <b>1</b>          |
| 24 | medicines                                          |                    |                   |                   |
| 25 |                                                    |                    |                   |                   |
| 26 |                                                    |                    |                   |                   |
| 27 |                                                    |                    |                   |                   |
| 28 |                                                    |                    |                   |                   |
| 29 |                                                    |                    |                   |                   |
| 30 |                                                    |                    |                   |                   |
| 31 |                                                    |                    |                   |                   |
| 32 |                                                    |                    |                   |                   |
| 33 |                                                    |                    |                   |                   |
| 34 |                                                    |                    |                   |                   |
| 35 |                                                    |                    |                   |                   |
| 36 |                                                    |                    |                   |                   |
| 37 |                                                    |                    |                   |                   |
| 38 |                                                    |                    |                   |                   |
| 39 |                                                    |                    |                   |                   |
| 40 |                                                    |                    |                   |                   |
| 41 |                                                    |                    |                   |                   |
| 42 |                                                    |                    |                   |                   |
| 43 |                                                    |                    |                   |                   |
| 44 |                                                    |                    |                   |                   |
| 45 |                                                    |                    |                   |                   |
| 46 |                                                    |                    |                   |                   |
| 47 |                                                    |                    |                   |                   |

## Discussion

Elderly patients are prone to multi-morbidity with high medication regimens complexity needing stopping of medications, a growing concept so called deprescribing [13]. Elderly patients receiving many medications with their underlined medical illness are vulnerable to re-hospitalization, drug induced complications and morbidity. Moreover, polypharmacy compromises patient adherence and lead to incur additional costs to manage unnecessary adverse outcomes [20-25]. Hence, mutual agreement between patients and clinical practitioners should be sought to optimize the elderly 'patients' medication regimen keeping with few numbers of medications [26]. To our knowledge, this is a first study to have been conducted on this study area in resource limited settings like Ethiopia.

In the current study, the mean and median number of their daily medications was 3.43 and 3 respectively which is very low as compared to other studies such as the mean of Kalogianis et al. study [12] was 14.6, while the median was 6 and 11 in Sirois et al study [16] and Reeve et al [13], respectively. In spite of having low median number of medications in the current study, majority (81.6%) of the patients still agreed to stop one of the medicines if their doctor advised them to stop. This is also consistent with previous studies conducted by Mona et al [12], Reeve et al [13] and Alessandro et al [27] having 80% , 68%, and 89% of patients' willingness rate to stop their medicines, respectively. This previews the importance of proactive engagement of health care professionals in deprescribing process for elderly patients and should discuss with their patients on how to optimize and simplify the dosage regimens.

Two third of patients believe that they spent a lot of money to medicines. In this regard medications costs are contributing to the patients to have positive attitude to deprescribing as they are willing to reduce one of the medicines. Other study has reported that patients having to

1  
2  
3 pay less for their medications would influence their willingness to have medications deprescribed  
4 and paying more encourage deprescribing [12]. It is always important to consider cost  
5  
6 implications in therapeutic decision making and drug selection in elderly patients as those  
7  
8 patients are prone to prolonged care, polypharmacy and less productivity to handle their  
9  
10 therapeutic expenses [28].  
11  
12

13  
14 This study has showed the association between each item and the selected three questions of the  
15  
16 survey items like perceiving of side effects from one or more of medicines taken, willingness to  
17  
18 stop one or more of medicines if advised by doctor, and overall satisfaction with their current  
19  
20 medications. In the current study, patient were willing to stop one or more of medications if  
21  
22 advised by doctor even if they were taking few medications, didn't perceive side effects from  
23  
24 one or more of their medications, were not reluctant to stop a medicine taken for a long time and  
25  
26 had overall satisfaction with their medications. Other studies also reported that patient  
27  
28 willingness to stop medication was correlated with a desire to take few medicines and the feeling  
29  
30 of taking a large number of medications and being less comfortable with current medications  
31  
32 [13, 15, 16].  
33  
34  
35  
36  
37

38 Majority of the elderly patients have curiosity to know about their medicines, ask their healthcare  
39  
40 provider and involve in the clinical decision making process. This is very important to patient-  
41  
42 provider relationships, encircling on the sub-themes of trust, relying on expertise and shared  
43  
44 decision making which are imperative to better patient outcomes. In spite of these, majority of  
45  
46 elderly patients do not have good knowledge of their medicines and merely dependent on the  
47  
48 health care providers to initiate decisions about their medications. Moreover, many patients who  
49  
50 have a preference to take fewer medicines do not share their beliefs with providers and waiting  
51  
52 for provider initiated medication discontinuation [29]. Thus health professionals should use a  
53  
54  
55  
56  
57  
58  
59  
60

1  
2  
3 patient centered approach to outweigh the risks and benefits of every medicine against the  
4  
5 particular goals of the elderly patient, with the aim of minimizing the total number of prescribed  
6  
7 medicines [30-32].  
8  
9

### 10 11 **Strengths and Limitations**

12 This is the first study in Ethiopia to assess elderly patients' perception towards deprescribing and  
13  
14 their willingness to stop medicines by using validated multidimensional questionnaire in  
15  
16 relatively large number of patients. Yet, the results of the current study should  
17  
18 be interpreted with caution due to some limitations. It is interviewer based questionnaire  
19  
20 structured for quantitative research, which does not permit in-depth investigation of patient  
21  
22 attitude. The rPATD questionnaire has not been yet validated in culturally different settings like  
23  
24 Ethiopia. This study may suffer from generalizability as the study was done in a single-center  
25  
26 university hospital.  
27  
28  
29  
30

### 31 32 **Conclusion**

33 Most of older patients (92.1%) were overall satisfied with medications they were taking.  
34  
35 However, majority of the participants (81.6%) were still willing to reduce one or more of their  
36  
37 medications if advised by their doctor. Therefore, health care providers should be proactive to  
38  
39 discuss, evaluate and decision making of potentially in appropriate medications. Further study  
40  
41 with potentially large number of study participants and qualitative study is warranted to fully  
42  
43 evaluate the deprescribing attitude in different disease categories and prospective significance to  
44  
45 Ethiopian elderly patients' health.  
46  
47  
48  
49

50  
51 **Acknowledgements** The authors acknowledge Akshaya Srikanth Bhagavathula for editing the  
52  
53 manuscript.  
54  
55  
56  
57  
58  
59

1  
2  
3 **Contributors** HGT has contributed to the conception, study design, prepared the study protocol  
4 and drafted the manuscript. YGT and DAE performed literature review, carried out statistical  
5 analyses, and interpreted the results. FC and YA acquired and managed the data. KTH, TBA,  
6  
7  
8  
9  
10 AAA wrote the manuscript and reviewed the manuscript for critical revisions. All authors  
11  
12 approved the final manuscript.  
13

14  
15  
16 **Competing interests** None declared.

17  
18 **Patient consent** Obtained.

19  
20 **Ethics approval** Ethical committee of School of Pharmacy, University of Gondar

21  
22 **Provenance and peer review** not commissioned; externally peer reviewed.

23  
24 **Data sharing statement** No additional data are available

25  
26  
27 **Funding Statement** Not funded

## 28 29 30 **References**

- 31 1. Bushardt RL, Massey EB, Simpson TW, Ariail JC, Simpson KN. Polypharmacy:  
32 misleading, but manageable. *ClinInterv Aging*. 2008;3(2):383-389.
- 33 2. Nebeker JR, Barach P, Samore MH. Clarifying adverse drug events: a clinician's guide to  
34 terminology, documentation, and reporting. *Ann Intern Med*. 2004;140(10):795-801
- 35 3. Gandhi TK, Weingart SN, Borus J, et al. Adverse drug events in ambulatory care. *N Engl*  
36 *J Med*. 2003;348(16):1556-1564.
- 37 4. Reeve E, Gnjjidic D, Long J, Hilmer S. A systematic review of the emerging definition of  
38 'deprescribing' with network analysis: implications for future research and clinical  
39 practice. *Br J ClinPharmacol* 2015; 80: 1254–68
- 40  
41  
42  
43  
44  
45  
46  
47  
48  
49  
50  
51  
52  
53  
54  
55  
56  
57  
58  
59  
60



- 1  
2  
3 5. Page AT, Clifford RM, Potter K, Schwartz D, Etherton Beer CD. The feasibility and the  
4  
5 effect of deprescribing in older adults on mortality and health: A systematic review.  
6  
7 British Journal of Clinical Pharmacology. 2016; 82(3):583-623  
8  
9
- 10 6. Reeve E, Wiese MD. Benefits of deprescribing on patients' adherence to medications. Int  
11  
12 J Clin Pharm 2014;36:26–9  
13
- 14 7. Abebe SM, Andargie G, Shimeka S, et al. The prevalence of non-communicable diseases  
15  
16 in northwest Ethiopia: survey of Dabat Health and Demographic Surveillance System.  
17  
18 BMJ Open. 2017; 7(10): e015496. doi: 10.1136/bmjopen-2016-015496  
19  
20
- 21 8. Center for national health development in Ethiopia.  
22  
23 <http://cnhde.ei.columbia.edu/healthsystem>  
24  
25
- 26 9. Iyer S, Naganathan V, McLachlan AJ, LeCouteur DG. Medication withdrawal trials in  
27  
28 people aged 65 years and older: a systematic review. Drugs Aging 2008;25:1021–31  
29  
30
- 31 10. Linsky A, Simon SR, Marcello TB, Bokhour B. Clinical provider perceptions of  
32  
33 proactive medication discontinuation. Am J Manag Care. 2015;21(4):277-283  
34
- 35 11. Phillips LS, Branch WT, Cook CB, et al. Clinical inertia. Ann Intern Med.  
36  
37 2001;135(9):825-834  
38  
39
- 40 12. Kalogianis MJ, Wimmer BC, Turner JP, et al. Are residents of aged care facilities willing  
41  
42 to have their medications deprescribed? Research in Social and Administrative Pharmacy  
43  
44 12 (2016) 784–788. <http://dx.doi.org/10.1016/j.sapharm.2015.12.004>....  
45  
46
- 47 13. Reeve E, Wiese M, Hendrix I, et al. People's attitudes, beliefs and experiences regarding  
48  
49 polypharmacy and willingness to deprescribe. J Am GeriatrSoc.2013;61:1508–1514...  
50  
51  
52  
53  
54  
55  
56  
57  
58  
59  
60

- 1  
2  
3 14. Qi K, Reeve E, Hilmer SN, Pearson S-A, Matthews S, Gnjidic D. Older peoples' attitudes  
4 regarding polypharmacy, statin use and willingness to have statins deprescribed in  
5 Australia. *Int J Clin Pharmacol*. 2015;37:949–957...  
6  
7  
8  
9  
10 15. Ng WL, Tan MZW, Koh EYL, Tan NC. Deprescribing: What are the views and factors  
11 influencing this concept among patients with chronic diseases in a developed Asian  
12 community? *Proc Singapore Healthc*. March 2017:1-8.  
13  
14  
15  
16  
17 doi:10.1177/2010105817699633....  
18  
19 16. Sirois C, Ouellet N, Reeve E. Community-dwelling older people's attitudes towards  
20 deprescribing in Canada. *Res Soc Adm Pharm*. 2017;13(4):864-870.  
21  
22  
23  
24  
25  
26  
27 17. Reeve E, Low LF, Shakib S, Hilmer SN. Development and validation of the revised  
28 Patients' Attitudes Towards Deprescribing (rPATD) Questionnaire: Versions for older  
29 adults and caregivers. *Drugs & aging*. 2016;33(12):913-28.  
30  
31  
32  
33 18. Horne R, Weinman J, Hankins M. The beliefs about medicines questionnaire: The  
34 development and evaluation of a new method for assessing the cognitive representation  
35 of medication. *Psychol Health* 1999;14:1–24  
36  
37  
38  
39  
40 19. IBM Corp. Released 2012. IBM SPSS Statistics for Windows, Version 21.0. Armonk,  
41 NY: IBM Corp.  
42  
43  
44 20. World Health Organization. Adherence to long-term therapies: evidence for action  
45 [online] (2013) [cited 2017 on Sept 21].  
46  
47  
48  
49  
50  
51  
52 21. Hajjar ER, Cafiero AC, Hanlon JT. Polypharmacy in elderly patients. *Am J*  
53  
54  
55  
56  
57  
58  
59  
60

- 1  
2  
3 22. Banning M. Medication management: older people and nursing. *Nurs Older People*.  
4 2005; 17(7):20–3.  
5  
6  
7  
8 23. Frazier SC. Health outcomes and polypharmacy in elderly individuals. *J GerontolNurs*.  
9 2005; 31(9):4–11.  
10  
11  
12 24. Guthrie B, McCowan C, Davey P, Simpson CR, Dreischulte T, Barnett K. High risk  
13 prescribing in primary care patients particularly vulnerable to adverse drug events: cross  
14 sectional population database analysis in Scottish general practice. *BMJ*.  
15 2011;21(342):d3514.  
16  
17  
18  
19 25. Giustini S, Thiry S. Medicinagenerale, multi morbilita` e politerapianeipazientianziani.  
20 *RivSocItaliana di Med Gen*. 2012;6:11–4.  
21  
22  
23  
24 26. Patterson SM, Hughes C, Kerse N, Cardwell CR, Bradley MC. Interventions to improve  
25 the appropriate use of polypharmacy for Older people. *Cochrane Database Syst Rev*  
26 2012; 5: Art. No.:CD008165  
27  
28  
29  
30  
31  
32 27. Alessandro G, Maura L, Maria TC, et al. Attitudes towards polypharmacy and  
33 medication withdrawal among older inpatients in Italy. *Int J Clin Pharm* (2016) 38:454–  
34 461.  
35  
36  
37  
38 28. Garfinkel D, Zur-Gil S, Ben-Israel J. The war against polypharmacy: a new cost-effective  
39 geriatric-palliative approach for improving drug therapy in disabled elderly people. *Isr*  
40 *Med Assoc J* 2007;9:430–434  
41  
42  
43 29. Linsky A, Simon SR, Bokhour B. Patient perceptions of proactive medication  
44 discontinuation. *Patient Education and Counseling*.2015; 98: 220–225.  
45  
46  
47 30. Page AT, Etherton-Ber CD, Clifford RM, Burrows S, Eames M, Potter K. Deprescribing  
48 in frail older people–Do doctors and pharmacists agree?. *Research in Social and*  
49 *Administrative Pharmacy*. 2016 Jun 30;12(3):438-49.  
50  
51  
52 31. Page A, Potter K, Clifford R, Etherton-Ber C. Deprescribing in older people. *Maturitas*.  
53 2016;91:115-134.  
54  
55  
56  
57  
58  
59  
60

1  
2  
3  
4  
5  
6  
7  
8  
9  
10  
11  
12  
13  
14  
15  
16  
17  
18  
19  
20  
21  
22  
23  
24  
25  
26  
27  
28  
29  
30  
31  
32  
33  
34  
35  
36  
37  
38  
39  
40  
41  
42  
43  
44  
45  
46  
47  
48  
49  
50  
51  
52  
53  
54  
55  
56  
57  
58  
59  
60

32. Potter K, Page A, Clifford R, Etherton-Bear C. Deprescribing: A guide for medication reviews. *Journal of Pharmacy Practice and Research*. 2016;46(4): 358–367

For peer review only

**STROBE 2007 (v4) Statement—Checklist of items that should be included in reports of *cross-sectional studies***

| Section/Topic                | Item # | Recommendation                                                                                                                                                                       | Reported on page #     |
|------------------------------|--------|--------------------------------------------------------------------------------------------------------------------------------------------------------------------------------------|------------------------|
| <b>Title and abstract</b>    | 1      | (a) Indicate the study's design with a commonly used term in the title or the abstract                                                                                               | P1,L2 and P2, L4       |
|                              |        | (b) Provide in the abstract an informative and balanced summary of what was done and what was found                                                                                  | Page 2, L1-23          |
| <b>Introduction</b>          |        |                                                                                                                                                                                      |                        |
| Background/rationale         | 2      | Explain the scientific background and rationale for the investigation being reported                                                                                                 | P3,L13-24 and P4,L1-20 |
| Objectives                   | 3      | State specific objectives, including any prespecified hypotheses                                                                                                                     | P4, L18-20             |
| <b>Methods</b>               |        |                                                                                                                                                                                      |                        |
| Study design                 | 4      | Present key elements of study design early in the paper                                                                                                                              | P5,L1                  |
| Setting                      | 5      | Describe the setting, locations, and relevant dates, including periods of recruitment, exposure, follow-up, and data collection                                                      | P5,P2-5                |
| Participants                 | 6      | (a) Give the eligibility criteria, and the sources and methods of selection of participants                                                                                          | P5, L7-12              |
| Variables                    | 7      | Clearly define all outcomes, exposures, predictors, potential confounders, and effect modifiers. Give diagnostic criteria, if applicable                                             | P5,L13-16              |
| Data sources/<br>measurement | 8*     | For each variable of interest, give sources of data and details of methods of assessment (measurement). Describe comparability of assessment methods if there is more than one group | P5,L18-23 and P6,1-11  |
| Bias                         | 9      | Describe any efforts to address potential sources of bias                                                                                                                            | P6,L11-14              |
| Study size                   | 10     | Explain how the study size was arrived at                                                                                                                                            | P5, L14 and L15        |
| Quantitative variables       | 11     | Explain how quantitative variables were handled in the analyses. If applicable, describe which groupings were chosen and why                                                         | NA                     |
| Statistical methods          | 12     | (a) Describe all statistical methods, including those used to control for confounding                                                                                                | P7,L4-6                |
|                              |        | (b) Describe any methods used to examine subgroups and interactions                                                                                                                  | P6,22-23               |
|                              |        | (c) Explain how missing data were addressed                                                                                                                                          | NA                     |
|                              |        | (d) If applicable, describe analytical methods taking account of sampling strategy                                                                                                   | NA                     |
|                              |        | (e) Describe any sensitivity analyses                                                                                                                                                | NA                     |

|                          |     |                                                                                                                                                                                                              |                  |
|--------------------------|-----|--------------------------------------------------------------------------------------------------------------------------------------------------------------------------------------------------------------|------------------|
| <b>Results</b>           |     |                                                                                                                                                                                                              |                  |
| Participants             | 13* | (a) Report numbers of individuals at each stage of study—eg numbers potentially eligible, examined for eligibility, confirmed eligible, included in the study, completing follow-up, and analysed            | P7,L20-22        |
|                          |     | (b) Give reasons for non-participation at each stage                                                                                                                                                         | NA               |
|                          |     | (c) Consider use of a flow diagram                                                                                                                                                                           | NA               |
| Descriptive data         | 14* | (a) Give characteristics of study participants (eg demographic, clinical, social) and information on exposures and potential confounders                                                                     | P8,L1-5          |
|                          |     | (b) Indicate number of participants with missing data for each variable of interest                                                                                                                          | P8,L7            |
| Outcome data             | 15* | Report numbers of outcome events or summary measures                                                                                                                                                         | P9,L1-10         |
| Main results             | 16  | (a) Give unadjusted estimates and, if applicable, confounder-adjusted estimates and their precision (eg, 95% confidence interval). Make clear which confounders were adjusted for and why they were included | Page 10, Table 2 |
|                          |     | (b) Report category boundaries when continuous variables were categorized                                                                                                                                    | NA               |
|                          |     | (c) If relevant, consider translating estimates of relative risk into absolute risk for a meaningful time period                                                                                             | NA               |
| Other analyses           | 17  | Report other analyses done—eg analyses of subgroups and interactions, and sensitivity analyses                                                                                                               | NA               |
| <b>Discussion</b>        |     |                                                                                                                                                                                                              |                  |
| Key results              | 18  | Summarise key results with reference to study objectives                                                                                                                                                     | P14-16           |
| Limitations              | 19  | Discuss limitations of the study, taking into account sources of potential bias or imprecision. Discuss both direction and magnitude of any potential bias                                                   | P16, L7-11       |
| Interpretation           | 20  | Give a cautious overall interpretation of results considering objectives, limitations, multiplicity of analyses, results from similar studies, and other relevant evidence                                   | P16, L7-8        |
| Generalisability         | 21  | Discuss the generalisability (external validity) of the study results                                                                                                                                        | P16, L10-11      |
| <b>Other information</b> |     |                                                                                                                                                                                                              |                  |
| Funding                  | 22  | Give the source of funding and the role of the funders for the present study and, if applicable, for the original study on which the present article is based                                                | NA               |

Abb: NA- Not applicable

\*Give information separately for cases and controls in case-control studies and, if applicable, for exposed and unexposed groups in cohort and cross-sectional studies.

**Note:** An Explanation and Elaboration article discusses each checklist item and gives methodological background and published examples of transparent reporting. The STROBE checklist is best used in conjunction with this article (freely available on the Web sites of PLoS Medicine at <http://www.plosmedicine.org/>, Annals of Internal Medicine at <http://www.annals.org/>, and Epidemiology at <http://www.epidem.com/>). Information on the STROBE Initiative is available at [www.strobe-statement.org](http://www.strobe-statement.org).

For peer review only

1  
2  
3  
4  
5  
6  
7  
8  
9  
10  
11  
12  
13  
14  
15  
16  
17  
18  
19  
20  
21  
22  
23  
24  
25  
26  
27  
28  
29  
30  
31  
32  
33  
34  
35  
36  
37  
38  
39  
40  
41  
42  
43  
44  
45  
46  
47

# BMJ Open

## Older patients' perception to deprescribing in resource limited settings: A cross sectional study in an Ethiopia University Hospital.

|                                    |                                                                                                                                                                                                                                                                                                                                                                                                                                                                                                                                                                                                 |
|------------------------------------|-------------------------------------------------------------------------------------------------------------------------------------------------------------------------------------------------------------------------------------------------------------------------------------------------------------------------------------------------------------------------------------------------------------------------------------------------------------------------------------------------------------------------------------------------------------------------------------------------|
| Journal:                           | <i>BMJ Open</i>                                                                                                                                                                                                                                                                                                                                                                                                                                                                                                                                                                                 |
| Manuscript ID                      | bmjopen-2017-020590.R2                                                                                                                                                                                                                                                                                                                                                                                                                                                                                                                                                                          |
| Article Type:                      | Research                                                                                                                                                                                                                                                                                                                                                                                                                                                                                                                                                                                        |
| Date Submitted by the Author:      | 08-Mar-2018                                                                                                                                                                                                                                                                                                                                                                                                                                                                                                                                                                                     |
| Complete List of Authors:          | Tegegn, Henok; University of Gondar, Clinical Pharmacy<br>Tefera, Yonas; University of Gondar, Clinical pharmacy<br>Erku, Daniel ; University of Gondar, Clinical Pharmacy<br>Haile, Kaleab ; University of Gondar, Pharmaceutics and Social Pharmacy<br>Abebe, Tamrat; University of Gondar, Clinical Pharmacy; Karolinska<br>Institute, Department of Learning, Informatics, Management and Ethics<br>(LIME)<br>Chekol, Fasil; University of Gondar, Clinical Pharmacy<br>azanaw, yonas ; University of Gondar, Clinical Pharmacy<br>Ayele, Asnakew ; University of Gondar, Clinical Pharmacy |
| <b>Primary Subject<br>Heading</b>: | Geriatric medicine                                                                                                                                                                                                                                                                                                                                                                                                                                                                                                                                                                              |
| Secondary Subject Heading:         | Medical management, Patient-centred medicine, Communication, General<br>practice / Family practice                                                                                                                                                                                                                                                                                                                                                                                                                                                                                              |
| Keywords:                          | Attitude, medication discontinuation, Deprescribing, Polypharmacy, elderly,<br>rPATD                                                                                                                                                                                                                                                                                                                                                                                                                                                                                                            |
|                                    |                                                                                                                                                                                                                                                                                                                                                                                                                                                                                                                                                                                                 |

SCHOLARONE™  
Manuscripts



1  
2  
3 **Older patients' perception to deprescribing in resource limited settings: A cross sectional**  
4  
5 **study in an Ethiopia University Hospital.**  
6

7 Henok Getachew Tegegn<sup>1</sup>, Yonas Getaye Tefera<sup>1</sup>, Daniel Asfaw Erku<sup>1</sup>, Kaleab Taye Haile<sup>3</sup>,  
8 Tamrat Befekadu Abebe<sup>1,2</sup>, Fasil Chekol<sup>1</sup>, Yonas Azanaw<sup>1</sup>, Asnakew Achaw Ayele<sup>1</sup>  
9

10  
11 <sup>1</sup>Department of Clinical Pharmacy, University of Gondar, Gondar, Amhara, Ethiopia  
12

13 <sup>2</sup>Masters program in health economics, policy and management; Student; Department of  
14 Learning, Informatics, Management and Ethics (LIME); Karolinska Institute; Solna; Sweden  
15

16 <sup>3</sup>Department of Pharmaceutics and Social Pharmacy, University of Gondar, Gondar, Amhara,  
17 Ethiopia  
18  
19  
20  
21  
22  
23  
24  
25  
26  
27  
28  
29

30  
31 **CORRESPONDING AUTHOR**

32 HenokGetachewTegegn (BPharm, MSc)

33 Assistant Professor of Clinical Pharmacy

34 Clinical Pharmacy Department, School of Pharmacy, University of Gondar, Ethiopia

35 P.O. Box: 196, Gondar, Ethiopia

36 Tel: +251911438077

37 Email Address: [heniget@gmail.com](mailto:heniget@gmail.com)  
38  
39  
40  
41  
42  
43  
44  
45  
46  
47  
48  
49  
50  
51  
52  
53  
54  
55  
56  
57  
58  
59  
60

## Abstract

**Objectives:** To assess older patients' attitude towards deprescribing of inappropriate medications.

**Design:** This was an institutional-based quantitative cross-sectional survey.

**Setting:** Outpatient clinics of the University of Gondar referral and teaching hospital (UoGRTH) in Ethiopia.

**Participants:** Patients aged 65 or older with at least one medication were enrolled in the study from March 1 to June 30, 2017. Excluded patients were those who had severe physical or psychological problems and refused to participate.

**Main outcome measures:** Older patients' attitude towards deprescribing was measured using a validated instrument, 'the revised Patients' Attitudes towards Deprescribing' (rPATD) tool for older patients. Data were collected on sociodemographic characteristics and clinical data such as co-morbidity and polypharmacy, and the main outcome was older patients' willingness to deprescribing of inappropriate medications.

**Results:** Of the 351 eligible participants, 316 patients completed the survey. Of the 316 patients, 54.7 % were men and were taking a median of 3 (IQR: 2–4) medications daily. Overall, most of the participants (92.1%; 95% CI: 89%–95%) were satisfied with the medications they were taking; however, still a significant number of participants (81.6%; 95%CI: 77%–86%) were willing to stop one or more of their medications if possible and agreed by their doctor. This willingness was correlated with seven items of the rPATD, including strong correlation with the overall satisfaction of patients with their medication taken.

**Conclusion:** Many older patients have shown their willingness for a reduction in one or more of their medications if their doctor said it was possible. Health care providers should be proactive to discuss and evaluate potentially inappropriate medications for better clinical decision making.

Key words: Attitude; medication discontinuation; deprescribing; polypharmacy; elderly

### Strengths and limitations of this study

- Older patients' attitude towards deprescribing and their willingness to stop medications has been assessed for the first time in resource limited setting.
- This study utilized a validated multidimensional questionnaire in a relatively large number of patients.
- The validated tool of rPATD, however, has not been tested in a culturally diverse settings, such as Ethiopia
- Owing to the interviewer based questionnaire structured for quantitative research, it does not permit in-depth investigation of patient attitude.
- Care givers for older patients have not been included in the current study as they may affect on the preference and willingness to stop medications.

### Introduction

Polypharmacy often defined as the practice of prescribing five or more medications to the same person, has been linked with pervasive adverse drug events and ultimately leads to increased morbidity, mortality and healthcare costs [1-3]. Polypharmacy-related adverse drug events (ADEs) are very common and estimated to occur in 25% of ambulatory care patients [3]. Deprescribing, one of the approaches to prevent polypharmacy-related ADEs, is defined as the 'the process of withdrawal of inappropriate medication, supervised by a health care professional with the goal of managing polypharmacy and improving outcomes' [4]. Given the holistic and patient-centered nature of deprescribing, it has a number of benefits to the patient. A recent systematic review conducted by Page et al. reported that individualized deprescribing interventions to reduce inappropriate polypharmacy may improve mortality [5]. Deprescribing also has potentially additional benefits to the patient such as increasing patient

1  
2  
3 engagement in medication therapy management and improving adherence possibly through  
4  
5 reducing polypharmacy [6].  
6

7  
8 The impact of deprescribing is conceivably beneficial for older patients living in resource limited  
9  
10 countries such as Ethiopia, where the incidence of chronic non-communicable diseases and  
11  
12 multimorbidity is mounting in alarming rate [7]. The burden of chronic diseases alongside with  
13  
14 Ethiopian patients' out of pocket expenses and affordability for drug purchases particularly from  
15  
16 private drug retail outlets is challenging for most patients. [8]  
17

18  
19 While concepts such as adherence and medication reconciliation received considerable attention,  
20  
21 and covered by a wide range of literatures worldwide, little attention has been given to the  
22  
23 concept of deprescribing and reduction of inappropriate polypharmacy [9]. Despite the  
24  
25 prescribers' positive attitude on deprescribing [10], many factors including clinical uncertainty  
26  
27 and shared responsibility with other healthcare providers severely impede clinicians' ability to  
28  
29 proactively discontinue medications [11]. Moreover, patient perspectives on deprescribing and  
30  
31 their communication with clinicians are equally important in evidence based medication  
32  
33 discontinuation process. Several studies conducted in developed countries regarding older  
34  
35 peoples' attitudes toward deprescribing reported a higher rate of willingness to discontinue their  
36  
37 medications [12-16]. However, no previous study has explored the attitudes of Ethiopian older  
38  
39 patients regarding their medications and deprescribing. It is also uncertain how patients would  
40  
41 respond to a suggestion from a clinician to intentionally discontinue a medication. Taking the  
42  
43 global evidence into consideration and due to lack of data in Ethiopia, we sought to identify  
44  
45 Ethiopian older patients' willingness to have their medications deprescribed.  
46  
47  
48  
49  
50  
51  
52  
53  
54  
55  
56  
57  
58  
59  
60

## Methods

### Study design and setting

Institutional-based quantitative cross-sectional survey was conducted from March 1 to June 30, 2017 at the University of Gondar referral and teaching hospital (UoGRTH), Ethiopia. The hospital is located in Gondar town, northwest Ethiopia, 738km away from Addis Ababa and it's the only referral and teaching center in the area where majority of patients with chronic diseases including hypertension, diabetes mellitus, cancer and asthma are referred.

### Participants

All older patients ( $\geq 65$  years) who had been taking at least one medication regardless of their diagnosis and who visited the outpatient clinic of the University of Gondar referral and teaching hospital (UoGRTH) for follow-up as well as medication refill were included. Patients who had severe physical or psychological problems and those who refused to participate were excluded from the survey. Of 351 eligible participants obtained during the study period, 316 older adult patients completed the survey data.

**Main outcome measures:** Older patients' attitude towards deprescribing was measured using the validated tool of revised the Patients' Attitudes towards Deprescribing (rPATD) for older patients. Predictive variables were Sociodemographic and clinical data such as comorbidity and polypharmacy. The main outcome of interest was older patients' willingness to deprescribing of their medications. .

## Survey instrument

We used the revised patients' attitudes towards deprescribing (rPATD) questionnaire [17]. It is a validated multidimensional questionnaire which measure patients' attitudes, knowledge and experiences related to medication discontinuation. The original a 5-point Likert scale in rPATD questionnaire, was changed to a 4-point Likert scale (strongly agree, agree, disagree and strongly disagree) in the current study as it may allow the participants to be more discriminating and avoid misinterpretation of mid points. The rPATD questionnaire has four major factors including Burden factor (5 items); Appropriateness factor (5 items); Concerns about stopping factor (5 items); Involvement factor (5 items) and additional two global questions are also considered. The previously validated tool -Belief in Medicine use Questionnaire (BMQ)-Overuse [18] was utilized for comparison and validation of the rPATD questionnaire. The questionnaire, first prepared in English, was translated into Amharic language and back to English so as to ensure that the translated version gave the proper meaning. It was further pre-tested on 25 elderly patients, who were not included in the final analysis, and slight modifications were instituted before the commencement of the final survey. Polypharmacy was defined as the use of  $\geq 5$  regular medications.

Data were collected by three of the principal investigators through interviewer-administered questionnaire. Due to low literacy level of the participants in our study setting, we were forced to interview most of the patients rather than self administration to clarify the questions. The investigators were properly trained on the instrument and ways of approaching the patients and securing their permission for interview prior to the data collection process. This training was conducted in the actual place of study setting to see if the investigators could manage data

1  
2  
3 collection efficiently with adequate background knowledge about the study; working  
4 independently; and good communication skills.  
5  
6  
7

### 8 **Patient and Public Involvement statement**

9  
10  
11 Research questions have been identified during medication review and provision of counseling to  
12 older patients while in efforts to get older patients involved in decision making process.  
13  
14 Moreover, the local advocacy group so called Young professionals chronic disease network (YP-  
15  
16 CDN) Ethiopia chapter has worked with older patients living with chronic diseases and identified  
17  
18 their priorities for advocacy and used as an input for this research project.  
19  
20  
21

22  
23 Patients were involved in the design of this study by identifying the research question; and  
24  
25 identifying the need for preliminary study. However, they were not involved in the recruitment  
26  
27 and conduct of the study.  
28  
29

30  
31 The study results will be disseminated both to the study participants and to the wider public  
32  
33 using easy and accessible formats with understandable language by the public during health care  
34  
35 provision and health education program. The Authors will communicate the findings through  
36  
37 national and international conferences. It will also be posted in an international advocacy  
38  
39 websites such as YP-CDN website.  
40  
41  
42

### 43 **Statistical analysis**

44  
45  
46 All the statistical analyses were done using Statistical Package for Social Sciences (SPSS)  
47  
48 software version 21.0 for Windows (SPSS Inc., Chicago, IL) [19]. Data were summarized as  
49  
50 frequencies and percentages.. Data were screened for normality using both the Shapiro–Wilk and  
51  
52 Kolmogorov-Smirnov tests. Respondents were stratified by polypharmacy status to examine  
53  
54 patients' attitude towards deprescribing..  
55  
56  
57  
58  
59  
60

1  
2  
3 Correlation analysis using Spearman's Rho was used to assess the associations between all  
4 rPATD items and three individual questions: patients' perception of side effect from their  
5 medications, patients' willingness to discontinue their medications if the doctor said possible,  
6 and overall satisfaction of patients with their medication taken. Binary logistic regression was  
7 performed after dichotomizing the two item questions (willingness to deprescribe one or more of  
8 their regular medications if the doctor said it was possible and overall satisfaction with their  
9 prescribed medications) by grouping the 4 Likert responses to "strongly agree and agree" versus  
10 "strongly disagree and disagree" as shown in supplementary table.  
11  
12  
13  
14  
15  
16  
17  
18  
19  
20  
21

### 22 **Ethical Consideration**

23  
24 This study was approved by the Ethical committee of School of Pharmacy, University of Gondar  
25 with an approval number of UoG-SoP-131/2017. Written informed consent from the respondents  
26 was also obtained before conducting this study. Participants' information obtained was kept  
27 confidential.  
28  
29  
30  
31  
32

### 33 **Results**

34  
35 A total of 351 patients were approached; of whom, 316 completed the questionnaire (response  
36 rate, 90%). The median age of the participants was 70 years (IQR: 67-75). The median number  
37 of their daily medications was 3 (IQR: 2-4). From the total number of participants, 62 (19.7%)  
38 were on polypharmacy. The commonest reason for hospital visits both in the polypharmacy and  
39 non-polypharmacy groups were hypertension and diabetes mellitus (DM). A detail of  
40 sociodemographic characteristics of the study participants is tabulated in Table 1.  
41  
42  
43  
44  
45  
46  
47  
48  
49  
50  
51  
52  
53  
54  
55  
56  
57  
58  
59  
60



**Table 1:** Sociodemographic and clinical characteristics of study participants, (n = 316).

| Variable                                                          | Participants, N (%)  | Polypharmacy N (%) |                       |
|-------------------------------------------------------------------|----------------------|--------------------|-----------------------|
|                                                                   |                      | Yes (N=62)         | No (N=254)            |
| <b>Gender</b>                                                     |                      |                    |                       |
| Male                                                              | 173(54.7)            | 35 (56.45 )        | 138 (54.55)           |
| Female                                                            | 143 (45.3)           | 27 (43.55)         | 116 (45.45)           |
| <b>Age(median; Interquartile range(IQR))</b>                      | 70(67-75)            | 70(67-73)          | 70(67-75)             |
| <b>Educational status</b>                                         |                      |                    |                       |
| Unable to read and to write                                       | 202 (64)             | 37 (59.68 )        | 165 (65.2 )           |
| Primary school                                                    | 62 (19.6)            | 13 (20.97 )        | 49 (19.37 )           |
| Secondary School                                                  | 32 (10.1)            | 5 (8.06 )          | 26 (10.28 )           |
| Higher education                                                  | 20 (6.3)             | 7 (11.29 )         | 13 (5.14 )            |
| <b>Reason of hospital visit(N=315)</b>                            |                      |                    |                       |
| Hypertension                                                      | 128(40.5)            | 20(32.3)           | 108 (42.5)            |
| Heart failure                                                     | 23(7.3)              | 8(1.3)             | 15 (5.9)              |
| Diabetes Mellitus                                                 | 105(33.2)            | 22(35.5)           | 83 (32.7)             |
| Chronic kidney disease                                            | 14(4.4)              | 1(1.6)             | 13 (5.1)              |
| Asthma                                                            | 8 (2.5)              | 2(3.2)             | 6 (2.4)               |
| Rheumatoid Heart Disease                                          | 10(3.2)              | 4(6.5)             | 6 (2.4)               |
| Others                                                            | 27(8.6) <sup>a</sup> | 5(8.1)             | 22 (9.1) <sup>a</sup> |
| <b>Charlson Comorbidity index<sup>a</sup>(median;IQR) (N=315)</b> | 2(1-2)               | 2(2-3)             | 2(1-2)                |
| <b>Number of Medication (median;IQR)</b>                          | 3(2-4)               | 5(5-6)             | 3(2-3)                |

Note: <sup>a</sup> data was missing for one participant

As reported in table 2, a total of 316 participants responded to 22 rPATD questions. In a burden factor domain, a total of 214 older patients (67.7%; 95%CI: 63%–73%) taught that they spent a lot of money for purchasing their medications, yet, there had been a considerable percentage of participants (61.5%) that did not feel their medications were a burden to them. Appropriateness factor domain showed that close to 90% of the participants thought that one or more of their medications may not be working if stopped taking, and this was further confirmed from their intention to stop their medications; only 9.4% had tried stopping medications in order to see how they felt without taking medications. ..Concerns about stopping factor; most of the respondents (89.2%; 95% CI: 86%-93%) were worried about missing out the future benefits if one of their medications had been stopped. In the involvement factor, majority of the respondents [257

1  
2  
3 participants; 81.3%;95% CI: (77%-86%)] asked their doctor, pharmacist or other health care  
4 professional if there was any miss-understanding about their medications. If the doctor said it  
5 was possible, about 258 individuals (81.6%; 95%CI: 77%-86%) were willing to stop one or more  
6 of their regular medications although a significant number of participants were overall satisfied  
7 with medications they were taking (92.1%; 95% CI: 89%-95%) (Table 2).  
8  
9

10  
11 Patients' perception of side effect from their medications was positively associated with the  
12 thirteen items but negatively with the three items. Those patients who thought their medications  
13 are a burden to them were more likely perceived side effects from one or more medications. There  
14 had been a lack of an overall satisfaction with the medications patients were taking if they  
15 perceived side effects from one or more of their medications (Table 3).  
16  
17

18  
19 The patients' willingness to discontinue their medications if their doctor said it was possible was  
20 correlated with seven items of the rPATD. Of the three items positively associated with this  
21 question, patients are willing to stop one or more of their medications if they were told to do by  
22 their doctor even though they may be worried about missing out the future benefits while stopping  
23 one of their medications. In the contrary, four of the items were negatively correlated with  
24 willingness to discontinue their medications if the doctor said it was possible such as belief that  
25 participants were taking too many medications, were perceiving side effects from one or more of  
26 their medications, were reluctant to stop a medication taken for a long time, and perceived their  
27 doctor giving up on them if their doctor recommended stopping a medicine. The overall  
28 satisfaction of patients with their medication taken was correlated with many items of the rPATD  
29 questionnaire as described in detail in Table 3.  
30  
31  
32  
33  
34  
35  
36  
37  
38  
39  
40  
41  
42  
43  
44  
45  
46  
47  
48  
49  
50  
51  
52  
53  
54  
55  
56  
57  
58  
59  
60

**Table 2:** Patients' attitudes towards deprescribing based on the rPATD questionnaire (n = 316).

| Survey questions                      |                                                                                                       | Strongly disagree | Disagree  | Agree     | Strongly agree | Strongly agree/ Agree % (95% CI) |
|---------------------------------------|-------------------------------------------------------------------------------------------------------|-------------------|-----------|-----------|----------------|----------------------------------|
| <b>Burden Factor</b>                  |                                                                                                       |                   |           |           |                |                                  |
| B1                                    | I spent a lot of money on my medicines                                                                | 87(27)            | 15(4.7)   | 84(26.6)  | 130(41.1)      | 67.7% (63-73)                    |
| B2                                    | Taking my medicines every day is very inconvenient                                                    | 104(32.9)         | 92(29.1)  | 107(33.9) | 13(4.1)        | 38% (32.6-43.4)                  |
| B3                                    | I feel that I am taking a large number of medicine                                                    | 88(27.8)          | 68(21.5)  | 135(42.7) | 25(7.9)        | 50.6% (45-56)                    |
| B4                                    | I feel that my medicines are a burden to me                                                           | 114(36.1)         | 80(25.4)  | 110(34.8) | 12(3.8)        | 38.6% (33-44)                    |
| B5                                    | Sometimes I think I take too many medicines                                                           | 134(42.4)         | 69(21.8)  | 105(33.2) | 8(2.5)         | 35.7% (30-41)                    |
| <b>Appropriateness Factor</b>         |                                                                                                       |                   |           |           |                |                                  |
| A1                                    | I feel that I may be taking one or medicines that I no longer need                                    | 144(45.6)         | 65(20.6)  | 95(30.1)  | 12(3.8)        | 33.9% (29-39)                    |
| A2                                    | I would like to try stopping one of my medicines to see how I feel without it                         | 257(81.3)         | 29(9.2)   | 21(6.6)   | 9(2.8)         | 9.4% (6-13)                      |
| A3                                    | I would like my doctor to reduce the dose of one or more my medicines                                 | 133(42.1)         | 49(15.5)  | 104(32.9) | 30(9.5)        | 42.4% (37-48)                    |
| A4                                    | I think one or more of my medicines may not be working                                                | 7(2.2)            | 24(7.6)   | 281(88.9) | 4(1.3)         | 90.2% (87-93)                    |
| A5                                    | I believe one or more of my medicines may be currently giving me side effects                         | 114(36.1)         | 70(22.2)  | 121(38.3) | 11(3.5)        | 41.8% (36-47)                    |
| <b>Concerns about stopping factor</b> |                                                                                                       |                   |           |           |                |                                  |
| C1                                    | I would be reluctant to stop a medicine that I had been taking for a long time                        | 109(34.5)         | 119(37.7) | 65(20.6)  | 23(7.3)        | 27.9% (23-33)                    |
| C2                                    | If one of my medicines was stopped I would be worried about missing out on future benefits            | 9(2.8)            | 25(7.9)   | 122(38.6) | 160(50.6)      | 89.2% (86-93)                    |
| C3                                    | I get stressed whenever changes are made to my medicines                                              | 87(27.5)          | 81(25.6)  | 132(41.8) | 16(5.1)        | 46.9% (41-52)                    |
| C4                                    | If my doctor recommended stopping a medicine I would feel that he/she was giving up on me             | 146(46.2)         | 82(25.9)  | 63(19.9)  | 25(7.9)        | 27.8% (23-33)                    |
| C5                                    | I have a bad experience when stopping a medicine before                                               | 186(58.9)         | 47(14.9)  | 45(14.2)  | 38(12.0)       | 26.5% (21-31)                    |
| <b>Involvement Factor</b>             |                                                                                                       |                   |           |           |                |                                  |
| I1                                    | I have a good understanding of the reasons I was prescribed each of my medicines                      | 59(18.7)          | 44(13.9)  | 168(53.2) | 45(14.2)       | 67.4% (62-73)                    |
| I2                                    | I know exactly what medicines I am currently taking, and/or I keep an up to date list of my medicines | 114(36.1)         | 126(39.9) | 65(20.6)  | 11(3.5)        | 24.1% (19-29)                    |

|                          |                                                                                                                                  |          |          |           |           |               |
|--------------------------|----------------------------------------------------------------------------------------------------------------------------------|----------|----------|-----------|-----------|---------------|
| I3                       | I like to know as much as possible about my medicines                                                                            | 71(22.5) | 54(17.1) | 162(51.3) | 29(9.2)   | 60.5% (55-66) |
| I4                       | I like to be involved in making decisions about my medicines with my doctors                                                     | 32(10.1) | 93(29.4) | 165(52.2) | 26(8.2)   | 60.4% (55-66) |
| I5                       | I always ask my doctor, pharmacist or other health care professional if there is something I don't understand about my medicines | 19(6.0)  | 40(12.7) | 161(50.9) | 96(30.4)  | 81.3% (77-86) |
| <b>General Questions</b> |                                                                                                                                  |          |          |           |           |               |
| G1                       | If my doctor said it was possible I would be willing to stop one or more of my regular medicines                                 | 22(7.0)  | 36(11.4) | 74(23.4)  | 184(58.2) | 81.6% (77-86) |
| G2                       | Overall, I am satisfied with my current medicines                                                                                | 9(2.8)   | 16(5.1)  | 120(38.0) | 171(54.1) | 92.1% (89-95) |

Adopted from the revised Patients' Attitudes Towards Deprescribing (rPATD) Questionnaire (17)

Table 3. Spearman Correlation of responses within the rPATD questionnaire

| rPATD questions<br>Spearman Correlation<br>( <i>p</i> -value)                                 | 10.I believe one or more of my<br>medicines may be currently<br>giving me side effects | 21. If my doctor said it<br>was possible I would be<br>willing to stop one or<br>more of my regular<br>medicines | 22.Overall, I am<br>satisfied with my<br>current medicines |
|-----------------------------------------------------------------------------------------------|----------------------------------------------------------------------------------------|------------------------------------------------------------------------------------------------------------------|------------------------------------------------------------|
| <b>Burden Factor</b>                                                                          |                                                                                        |                                                                                                                  |                                                            |
| 1. I spend a lot of money on my medicines                                                     | 0.03,0.63                                                                              | 0.14, 0.06                                                                                                       | <b>0.16, 0.00</b>                                          |
| 2.Taking my medicines every day is very inconvenient                                          | <b>0.24,0.00</b>                                                                       | -0.07, 0.19                                                                                                      | <b>-0.28,0.00</b>                                          |
| 3.I feel that I am taking a large number of medicine                                          | <b>0.15,0.01</b>                                                                       | -0.096,0.09                                                                                                      | <b>-0.35, 0.00</b>                                         |
| 4.I feel that my medicines are a burden to me                                                 | <b>0.31,0.00</b>                                                                       | -0.08, 0.17                                                                                                      | <b>-0.35,0.00</b>                                          |
| 5.Sometimes I think I take too many medicines                                                 | <b>0.25,0.00</b>                                                                       | <b>-0.22, 0.00</b>                                                                                               | <b>-0.53,0.00</b>                                          |
| <b>Appropriateness Factor</b>                                                                 |                                                                                        |                                                                                                                  |                                                            |
| 6.I feel that I may be taking one or medicines that I no longer need                          | <b>0.25,0.00</b>                                                                       | -0.09, 0.13                                                                                                      | <b>-0.38,0.00</b>                                          |
| 7. I would like to try stoppingone of my medicines to see how I feel without it               | 0.06,0.32                                                                              | -0.04, 0.48                                                                                                      | -0.1,0.42                                                  |
| 8.I would like my doctor to reduce the dose of one or more my medicines                       | <b>0.14,0.02</b>                                                                       | 0.04,0.4                                                                                                         | <b>-0.25,0.001</b>                                         |
| 9.I think one or more of my medicines may not be working                                      | <b>-0.11,0.04</b>                                                                      | 0.01,0.8                                                                                                         | <b>0.14,0.009</b>                                          |
| 10.I believe one or more of my medicines may be currently giving me side effects              | 1                                                                                      | <b>-0.14,0.08</b>                                                                                                | <b>-0.31,0.00</b>                                          |
| <b>Concerns about stopping factor</b>                                                         |                                                                                        |                                                                                                                  |                                                            |
| 11.I would be reluctant to stop a medicine that I had been taking for a long time             | <b>0.19,0.001</b>                                                                      | <b>-0.3,0.00</b>                                                                                                 | <b>-0.26,0.001</b>                                         |
| 12.If one of my medicines was stopped I would be worried about missing out on future benefits | <b>-0.20,0.00</b>                                                                      | <b>0.26,0.00</b>                                                                                                 | <b>0.55,0.00</b>                                           |
| 13.I get stressed whenever changes are made to my medicines                                   | <b>0.27,0.00</b>                                                                       | -0.07,0.19                                                                                                       | <b>-0.17,0.002</b>                                         |
| 14.If my doctor recommended stopping a medicine I would feel that he/she was giving up on me  | <b>0.12,0.03</b>                                                                       | <b>-0.37, 0.00</b>                                                                                               | <b>-0.34,0.00</b>                                          |
| 15.I have a bad experience when stopping a                                                    | <b>0.19,0.001</b>                                                                      | -0.07,0.22                                                                                                       | <b>-0.18,0.027</b>                                         |

|    |                                                                                                                                     |                    |                   |                   |
|----|-------------------------------------------------------------------------------------------------------------------------------------|--------------------|-------------------|-------------------|
| 1  | medicine before                                                                                                                     |                    |                   |                   |
| 2  |                                                                                                                                     |                    |                   |                   |
| 3  |                                                                                                                                     |                    |                   |                   |
| 4  | <b>Involvement Factor</b>                                                                                                           |                    |                   |                   |
| 5  |                                                                                                                                     |                    |                   |                   |
| 6  | 16.I have a good understanding of the reasons I was prescribed each of my medicines                                                 | <b>0.14,0.01</b>   | 0.04,0.53         | 0.02,0.74         |
| 7  |                                                                                                                                     |                    |                   |                   |
| 8  | 17.I know exactly what medicines I am currently taking, and/or I keep an up to date list of my medicines                            | <b>0.12,0.03</b>   | -0.02,0.71        | -0.001,0.98       |
| 9  |                                                                                                                                     |                    |                   |                   |
| 10 |                                                                                                                                     |                    |                   |                   |
| 11 | 18.I like to know as much as possible about my medicines                                                                            | <b>0.18, 0.001</b> | -0.08,0.14        | -0.11,0.175       |
| 12 |                                                                                                                                     |                    |                   |                   |
| 13 |                                                                                                                                     |                    |                   |                   |
| 14 | 19.I like to be involved in making decisions about my medicines with my doctors                                                     | -0.01,0.79         | -0.01,0.81        | 0.065,0.45        |
| 15 |                                                                                                                                     |                    |                   |                   |
| 16 | 20.I always ask my doctor, pharmacist or other health care professional if there is something I don't understand about my medicines | 0.05,0.36          | <b>0.13, 0.02</b> | <b>0.18,0.032</b> |
| 17 |                                                                                                                                     |                    |                   |                   |
| 18 |                                                                                                                                     |                    |                   |                   |
| 19 |                                                                                                                                     |                    |                   |                   |
| 20 | <b>General Questions</b>                                                                                                            |                    |                   |                   |
| 21 | 21.If my doctor said it was possible I would be willing to stop one or more of my regular medicines                                 | -0.14,0.08         | 1                 | <b>0.34,0.00</b>  |
| 22 |                                                                                                                                     |                    |                   |                   |
| 23 |                                                                                                                                     |                    |                   |                   |
| 24 | 22. Overall, I am satisfied with my current medicines                                                                               | <b>-0.31,0.00</b>  | <b>0.34, 0.00</b> | <b>1</b>          |
| 25 |                                                                                                                                     |                    |                   |                   |
| 26 |                                                                                                                                     |                    |                   |                   |
| 27 |                                                                                                                                     |                    |                   |                   |
| 28 |                                                                                                                                     |                    |                   |                   |
| 29 |                                                                                                                                     |                    |                   |                   |
| 30 |                                                                                                                                     |                    |                   |                   |
| 31 |                                                                                                                                     |                    |                   |                   |
| 32 |                                                                                                                                     |                    |                   |                   |
| 33 |                                                                                                                                     |                    |                   |                   |
| 34 |                                                                                                                                     |                    |                   |                   |
| 35 |                                                                                                                                     |                    |                   |                   |
| 36 |                                                                                                                                     |                    |                   |                   |
| 37 |                                                                                                                                     |                    |                   |                   |
| 38 |                                                                                                                                     |                    |                   |                   |
| 39 |                                                                                                                                     |                    |                   |                   |
| 40 |                                                                                                                                     |                    |                   |                   |
| 41 |                                                                                                                                     |                    |                   |                   |
| 42 |                                                                                                                                     |                    |                   |                   |
| 43 |                                                                                                                                     |                    |                   |                   |
| 44 |                                                                                                                                     |                    |                   |                   |
| 45 |                                                                                                                                     |                    |                   |                   |
| 46 |                                                                                                                                     |                    |                   |                   |
| 47 |                                                                                                                                     |                    |                   |                   |

## Discussion

Older adult patients are prone to multi-morbidity with high medication regimens complexity needing stopping of medications, a growing concept so called deprescribing [13]. Elderly patients receiving many medications with their underlined medical illness are vulnerable to re-hospitalization, drug induced complications and morbidity. Moreover, polypharmacy compromises patient adherence and lead to incur additional costs to manage unnecessary adverse outcomes [20-25]. Hence, mutual agreement between patients and clinical practitioners should be sought to optimize the elderly 'patients' medication regimen keeping with few numbers of medications [26]. To our knowledge, this is a first study to have been conducted on this study area in resource limited settings like Ethiopia.

In the current study, the median number of their daily medications (3) was very low as compared to other studies such as the mean of Kalogianis et al. study [12] was 14.6, while the median was 6 and 11 in Sirois et al [16] and Reeve et al study [13], respectively. In spite of having low median number of medications in the current study, majority (81.6%) of the patients agreed to stop one of the medicines if their doctor said it was possible. This is also consistent with previous studies conducted by Mona et al [12], Alessandro et al [27] and Reeve et al having 80% , 89% and 92% of patients' willingness rate to stop their medicines if informed to do by their doctor, respectively. This previews the importance of proactive engagement of health care professionals in deprescribing process for older adult patients and should discuss with their patients on how to optimize and simplify the dosage regimens. A small percentage (9.4%) of older patients would like to try stopping one of their medications to see how they feel without it and most of the respondents (89.2%) would be worried about missing out on future benefits if one of their medications was stopped. In this regard, older patients' hesitation to stop one of their

1  
2  
3 medications might be reasonable, but it might also a potential barrier to discontinuation of  
4 inappropriate medication. The suitability of deprescribing process of a particular medicine in  
5 variety of populations should be decided by the integrated approach of patients, caregivers, other  
6 health care providers based on the benefits and potential harms [28, 29].  
7  
8  
9  
10

11  
12 Two third of patients believe that they spent a lot of money to medicines. Even though in current  
13 study this variable was not correlated with the patients' willingness to stop one or more of the  
14 medicines if the doctor said it was possible, medications costs might contribute to the patients'  
15 positive attitude to deprescribing in resource limited setting. Other study has reported that  
16 patients having to pay less for their medications would influence their willingness to have  
17 medications deprescribed and paying more encourage deprescribing [12]. It is always important  
18 to consider cost implications in therapeutic decision making and drug selection in elderly  
19 patients as those patients are prone to prolonged care, polypharmacy and less productivity to  
20 handle their therapeutic expenses [30].  
21  
22  
23  
24  
25  
26  
27  
28  
29  
30  
31  
32

33 This study has showed the association between each item and the selected three questions of the  
34 survey items like perceiving of side effects from one or more of medicines taken, willingness to  
35 stop one or more of medicines if the doctor said it was possible, and overall satisfaction with  
36 their current medications. Patients didn't have overall satisfaction with their medications if they  
37 perceive side effect from one or more of the medications. In the current study, "Patients'  
38 willingness to stop one or more of medications if advised by doctor" were negatively correlated  
39 with others item questions such as "Sometimes I think I take too many medicines", "perceiving  
40 of side effects from one or more of their medications" and "being reluctant to stop a medicine  
41 taken for a long time . However, it was positively associated with "overall satisfaction with their  
42 medications" which in other words, patients were willing to stop one or more of medications if  
43  
44  
45  
46  
47  
48  
49  
50  
51  
52  
53  
54  
55  
56  
57  
58  
59  
60



1  
2  
3 the doctor said, it was possible, even if they had overall satisfaction with their medications. Other  
4  
5 studies also reported that patient willingness to stop medication was correlated with a desire to  
6  
7 take few medicines and the feeling of taking a large number of medications and being less  
8  
9 comfortable with current medications [13, 15, 16].  
10

11  
12 Majority of the respondents ask their doctor, pharmacist or other health care professional if there  
13  
14 is any miss-understanding about their medications. This imply older adults curiosity to know  
15  
16 about their medicines, ask their healthcare provider and involve in the clinical decision making  
17  
18 process. This is very important to patient-provider relationships, encircling on the sub-themes of  
19  
20 trust, relying on expertise and shared decision making which are imperative to better patient  
21  
22 outcomes. In spite of these, majority of older adult participants do not have good knowledge of  
23  
24 their medicines and merely dependent on the health care providers to initiate decisions about  
25  
26 their medications. Moreover, many patients who have a preference to take fewer medicines do  
27  
28 not share their beliefs with providers and waiting for provider initiated medication  
29  
30 discontinuation [31]. Thus health professionals should use a patient centered approach to  
31  
32 outweigh the risks and benefits of every medicine against the particular goals of the elderly  
33  
34 patient, with the aim of minimizing the total number of prescribed medicines [32-34].  
35  
36  
37  
38  
39  
40

### 41 **Strengths and Limitations**

42  
43 This is the first study in Ethiopia to assess older adults ' perception towards deprescribing and  
44  
45 their willingness to stop medicines by using validated multidimensional questionnaire in  
46  
47 relatively large number of patients. Yet, the results of the current study should  
48  
49 be interpreted with caution due to some limitations. It is interviewer based questionnaire  
50  
51 structured for quantitative research, which does not permit in-depth investigation of patient  
52  
53 attitude. The rPATD questionnaire has not been yet validated in culturally different settings like  
54  
55  
56  
57  
58  
59  
60

1  
2  
3 Ethiopia. This study may suffer from generalizability as the study was done in a single-center  
4  
5 university hospital.  
6  
7

### 8 9 **Conclusion**

10 Most of older patients (92.1%) were overall satisfied with medications they were taking.  
11  
12 However, majority of the participants (81.6%) were willing to reduce one or more of their  
13  
14 medications if their doctor said it was possible. Therefore, health care providers should be  
15  
16 proactive to discuss, evaluate and decision making of potentially in appropriate medications.  
17  
18 Further study with potentially large number of study participants and qualitative study is  
19  
20 warranted to fully evaluate the deprescribing attitude in different disease categories and  
21  
22 prospective significance to Ethiopian older adults' health.  
23  
24  
25  
26

27  
28 **Acknowledgements** The authors acknowledge Alemayehu B Mekonnen for editing the  
29  
30 manuscript; and the Ethiopian chapter YP-CDN in identifying older patients' priorities and  
31  
32 support in the research design.  
33

34  
35 **Contributors** HGT has contributed to the conception, study design, prepared the study protocol  
36  
37 and drafted the manuscript. YGT and DAE performed literature review, carried out statistical  
38  
39 analyses, and interpreted the results. FC and YA acquired and managed the data. KTH, TBA,  
40  
41 AAA wrote the manuscript and reviewed the manuscript for critical revisions. All authors  
42  
43 approved the final manuscript.  
44  
45

46  
47 **Competing interests:** No competing interest among Authors.

48  
49 **Patient consent:** Obtained.

50  
51 **Ethics approval:** Ethical committee of School of Pharmacy, University of Gondar

52  
53 **Provenance and peer review:** not commissioned; externally peer reviewed.

54  
55 **Data sharing statement:** No additional data are available  
56  
57  
58  
59  
60

**Funding Statement:** Not funded

## References

1. Bushardt RL, Massey EB, Simpson TW, Ariail JC, Simpson KN. Polypharmacy: misleading, but manageable. *ClinInterv Aging*. 2008;3(2):383-389.
2. Nebeker JR, Barach P, Samore MH. Clarifying adverse drug events: a clinician's guide to terminology, documentation, and reporting. *Ann Intern Med*. 2004;140(10):795-801
3. Gandhi TK, Weingart SN, Borus J, et al. Adverse drug events in ambulatory care. *N Engl J Med*. 2003;348(16):1556-1564.
4. Reeve E, Gnjjidic D, Long J, Hilmer S. A systematic review of the emerging definition of 'deprescribing' with network analysis: implications for future research and clinical practice. *Br J ClinPharmacol* 2015; 80: 1254–68
5. Page AT, Clifford RM, Potter K, Schwartz D, EthertonBeer CD. The feasibility and the effect of deprescribing in older adults on mortality and health: A systematic review. *British Journal of Clinical Pharmacology*. 2016; 82(3):583-623
6. Reeve E, Wiese MD. Benefits of deprescribing on patients' adherence to medications. *Int J Clin Pharm* 2014;36:26–9
7. AbebeSM, Andargie G, Shimeka S, et al. The prevalence of non-communicable diseases in northwest Ethiopia: survey of Dabat Health and Demographic Surveillance System. *BMJ Open*. 2017; 7(10): e015496. doi: 10.1136/bmjopen-2016-015496
8. Center for national health development in Ethiopia.  
<http://cnhde.ei.columbia.edu/healthsystem>
9. Iyer S, Naganathan V, McLachlan AJ, LeCouteur DG. Medication withdrawal trials in people aged 65 years and older: a systematic review. *Drugs Aging* 2008;25:1021–31

- 1  
2  
3 10. Linsky A, Simon SR, Marcello TB, Bokhour B. Clinical provider perceptions of  
4 proactive medication discontinuation. *Am J Manag Care*. 2015;21(4):277-283  
5  
6  
7  
8 11. Phillips LS, Branch WT, Cook CB, et al. Clinical inertia. *Ann Intern Med*.  
9 2001;135(9):825-834  
10  
11  
12 12. Kalogianis MJ, Wimmer BC, Turner JP, et al. Are residents of aged care facilities willing  
13 to have their medications deprescribed? *Research in Social and Administrative Pharmacy*  
14 12 (2016) 784–788. <http://dx.doi.org/10.1016/j.sapharm.2015.12.004>....  
15  
16  
17  
18 13. Reeve E, Wiese M, Hendrix I, Roberts MS, Shakib S . People’s attitudes, beliefs and  
19 experiences regarding polypharmacy and willingness to deprescribe. *J Am*  
20 *GeriatrSoc*.2013;61:1508–1514....  
21  
22  
23  
24 14. Qi K, Reeve E, Hilmer SN, Pearson S-A, Matthews S, Gnjidic D. Older peoples’  
25 attitudes regarding polypharmacy, statin use and willingness to have statins deprescribed  
26 in Australia. *Int J ClinPharmacol*. 2015;37:949–957...  
27  
28  
29  
30  
31  
32 15. Ng WL, Tan MZW, Koh EYL, Tan NC. Deprescribing: What are the views and factors  
33 influencing this concept among patients with chronic diseases in a developed Asian  
34 community? *Proc Singapore Healthc*. March 2017:1-8.  
35  
36  
37  
38  
39  
40  
41  
42  
43 16. Sirois C, Ouellet N, Reeve E. Community-dwelling older people’s attitudes towards  
44 deprescribing in Canada. *Res SocAdm Pharm*. 2017;13(4):864-870.  
45  
46  
47  
48  
49 17. Reeve E, Low LF, Shakib S, Hilmer SN. Development and validation of the revised  
50 Patients’ Attitudes Towards Deprescribing (rPATD) Questionnaire: Versions for older  
51 adults and caregivers. *Drugs & aging*. 2016;33(12):913-28.  
52  
53  
54  
55  
56  
57  
58  
59  
60

- 1  
2  
3 18. Horne R, Weinman J, Hankins M. The beliefs about medicines questionnaire: The  
4 development and evaluation of a new method for assessing the cognitive representation  
5 of medication. *Psychol Health* 1999;14:1–24  
6  
7  
8  
9  
10 19. IBM Corp. Released 2012. IBM SPSS Statistics for Windows, Version 21.0. Armonk,  
11 NY: IBM Corp.  
12  
13  
14 20. World Health Organization. Adherence to long-term therapies: evidence for action  
15 [online] (2013) [cited 2017 on Sept 21].  
16 [http://www.who.int/chp/knowledge/publications/adherence\\_report/en/index.html](http://www.who.int/chp/knowledge/publications/adherence_report/en/index.html).  
17  
18  
19  
20  
21 21. Hajjar ER, Cafiero AC, Hanlon JT. Polypharmacy in elderly patients. *Am J*  
22 *GeriatrPharmacother*. 2007; 5(4):345–51.  
23  
24  
25  
26 22. Banning M. Medication management: older people and nursing. *Nurs Older People*.  
27 2005; 17(7):20–3.  
28  
29  
30  
31 23. Frazier SC. Health outcomes and polypharmacy in elderly individuals. *J GerontolNurs*.  
32 2005; 31(9):4–11.  
33  
34  
35 24. Guthrie B, McCowan C, Davey P, Simpson CR, Dreischulte T, Barnett K. High risk  
36 prescribing in primary care patients particularly vulnerable to adverse drug events: cross  
37 sectional population database analysis in Scottish general practice. *BMJ*.  
38 2011;21(342):d3514.  
39  
40  
41  
42  
43  
44 25. Giustini S, Thiry S. Medicinagenerale, multi morbilita` e politerapianeipazientianziani.  
45 *RivSocItaliana di Med Gen*. 2012;6:11–4.  
46  
47  
48  
49 26. Patterson SM, Hughes C, Kerse N, Cardwell CR, Bradley MC. Interventions to improve  
50 the appropriate use of polypharmacy for Older people. *Cochrane Database Syst Rev*  
51 2012; 5: Art. No.:CD008165  
52  
53  
54  
55  
56  
57  
58  
59  
60

- 1  
2  
3 27. Alessandro G, Maura L, Maria TC, et al. Attitudes towards polypharmacy and  
4 medication withdrawal among older inpatients in Italy. *Int J Clin Pharm* (2016) 38:454–  
5 461.  
6  
7
- 8 28. Reeve E, Moriarty F, NahasR, Turner JP, O'Donnell LK, Hilmer SN. A narrative  
9 review of the safety concerns of deprescribing in older adults and strategies to mitigate  
10 potential harms. *Expert Opinion on Drug Safety*. 2018;17(1); 39-49, DOI:  
11 10.1080/14740338.2018.1397625).  
12  
13
- 14 29. Reeve E, Thompson W, Farrell B. Deprescribing: A narrative review of the evidence  
15 and practical recommendations for recognizing opportunities and taking action. *European*  
16 *Journal of Internal Medicine*. 2017;38; 3-11)  
17  
18
- 19 30. Garfinkel D, Zur-Gil S, Ben-Israel J. The war against polypharmacy: a new cost-effective  
20 geriatric-palliative approach for improving drug therapy in disabled elderly people. *Isr*  
21 *Med Assoc J* 2007;9:430–434  
22  
23
- 24 31. Linsky A, Simon SR, Bokhour B. Patient perceptions of proactive medication  
25 discontinuation. *Patient Education and Counseling*. 2015; 98: 220–225.  
26  
27
- 28 32. Page AT, Etherton-Ber CD, Clifford RM, Burrows S, Eames M, Potter K. Deprescribing  
29 in frail older people—Do doctors and pharmacists agree?. *Research in Social and*  
30 *Administrative Pharmacy*. 2016 Jun 30;12(3):438-49.  
31  
32
- 33 33. Page A, Potter K, Clifford R, Etherton-Ber C. Deprescribing in older people. *Maturitas*.  
34 2016;91:115-134.  
35  
36
- 37 34. Potter K, Page A, Clifford R, Etherton-Ber C. Deprescribing: A guide for medication  
38 reviews. *Journal of Pharmacy Practice and Research*. 2016;46(4): 358–367  
39  
40  
41  
42  
43  
44  
45  
46  
47  
48  
49  
50  
51  
52  
53  
54  
55  
56  
57  
58  
59  
60

## **Supplementary material**

Binary logistic regression was performed after dichotomizing the two item questions (willingness to deprescribe one or more of their regular medications if the doctor said it was possible and overall satisfaction with their prescribed medications) by grouping the 4 Likert responses to “strongly agree and agree” versus “strongly disagree and disagree”.

However, in Univariate analysis, Sociodemographic and clinical variables like Age, sex, Education, charlson comorbidity index (CCI) and reason of hospital visit (chief complaint) didn't fit final model according to the Hosmer-Lemeshow assumption owing to having  $p > 0.2$ . The level of statistical significance was defined as  $p < 0.05$  and all tests were two-tailed as shown in the table below.

**Supplementary Table:** Univariate analysis of Sociodemographic and clinical variables with the two item questions

| Variables                | 21. Willingness to stop one or more of regular medicines if the doctor said it was possible (agreed/strongly agreed) |         | 22. Overall satisfaction with the current medications (agreed/strongly agreed) |         |
|--------------------------|----------------------------------------------------------------------------------------------------------------------|---------|--------------------------------------------------------------------------------|---------|
|                          | COR (95% CI)                                                                                                         | P-Value | COR (95% CI)                                                                   | P-Value |
| Age                      | 1.02(0.98-1.06)                                                                                                      | 0.37    | 0.89(0.93-1.04)                                                                | 0.60    |
| Sex (male)               | 0.94(0.53-1.66)                                                                                                      | 0.83    | 1.26(0.55-2.9)                                                                 | 0.58    |
| Education                | -                                                                                                                    | 0.59    | -                                                                              | 0.35    |
| Unable to read and write | 1.39(0.48-4.06)                                                                                                      | 0.54    | 1.76(0.36-8.5)                                                                 | 0.48    |
| Primary school           | 2.25(0.64-7.89)                                                                                                      | 0.20    | 0.75(0.15-3.86)                                                                | 0.73    |
| Secondary school         | 1.44(0.37-5.5)                                                                                                       | 0.59    | 1.07(0.16-7.06)                                                                | 0.94    |
| Higher education         | 1                                                                                                                    | -       | 1                                                                              | -       |
| Reason of admission      | -                                                                                                                    | 0.96    | -                                                                              | 0.92    |
| CCI                      | 0.85(0.63-1.15)                                                                                                      | 0.37    | 0.82(0.54-1.25)                                                                | 0.35    |

Abbreviation: CCI: Charlson Comorbidity Index, CI: Confidence Interval, COR: Crude Odds Ratio

Note: None of the variables fits the final model ( $P > 0.2$ )

**STROBE 2007 (v4) Statement—Checklist of items that should be included in reports of *cross-sectional studies***

| Section/Topic                | Item # | Recommendation                                                                                                                                                                       | Reported on page #     |
|------------------------------|--------|--------------------------------------------------------------------------------------------------------------------------------------------------------------------------------------|------------------------|
| <b>Title and abstract</b>    | 1      | (a) Indicate the study's design with a commonly used term in the title or the abstract                                                                                               | P1,L2 and P2, L4       |
|                              |        | (b) Provide in the abstract an informative and balanced summary of what was done and what was found                                                                                  | Page 2, L1-23          |
| <b>Introduction</b>          |        |                                                                                                                                                                                      |                        |
| Background/rationale         | 2      | Explain the scientific background and rationale for the investigation being reported                                                                                                 | P3,L13-24 and P4,L1-20 |
| Objectives                   | 3      | State specific objectives, including any prespecified hypotheses                                                                                                                     | P4, L18-20             |
| <b>Methods</b>               |        |                                                                                                                                                                                      |                        |
| Study design                 | 4      | Present key elements of study design early in the paper                                                                                                                              | P5,L1                  |
| Setting                      | 5      | Describe the setting, locations, and relevant dates, including periods of recruitment, exposure, follow-up, and data collection                                                      | P5,P2-5                |
| Participants                 | 6      | (a) Give the eligibility criteria, and the sources and methods of selection of participants                                                                                          | P5, L7-12              |
| Variables                    | 7      | Clearly define all outcomes, exposures, predictors, potential confounders, and effect modifiers. Give diagnostic criteria, if applicable                                             | P5,L13-16              |
| Data sources/<br>measurement | 8*     | For each variable of interest, give sources of data and details of methods of assessment (measurement). Describe comparability of assessment methods if there is more than one group | P5,L18-23 and P6,1-11  |
| Bias                         | 9      | Describe any efforts to address potential sources of bias                                                                                                                            | P6,L11-14              |
| Study size                   | 10     | Explain how the study size was arrived at                                                                                                                                            | P5, L14 and L15        |
| Quantitative variables       | 11     | Explain how quantitative variables were handled in the analyses. If applicable, describe which groupings were chosen and why                                                         | NA                     |
| Statistical methods          | 12     | (a) Describe all statistical methods, including those used to control for confounding                                                                                                | P7,L4-6                |
|                              |        | (b) Describe any methods used to examine subgroups and interactions                                                                                                                  | P6,22-23               |
|                              |        | (c) Explain how missing data were addressed                                                                                                                                          | NA                     |
|                              |        | (d) If applicable, describe analytical methods taking account of sampling strategy                                                                                                   | NA                     |
|                              |        | (e) Describe any sensitivity analyses                                                                                                                                                | NA                     |



|                          |     |                                                                                                                                                                                                              |                  |
|--------------------------|-----|--------------------------------------------------------------------------------------------------------------------------------------------------------------------------------------------------------------|------------------|
| <b>Results</b>           |     |                                                                                                                                                                                                              |                  |
| Participants             | 13* | (a) Report numbers of individuals at each stage of study—eg numbers potentially eligible, examined for eligibility, confirmed eligible, included in the study, completing follow-up, and analysed            | P7,L20-22        |
|                          |     | (b) Give reasons for non-participation at each stage                                                                                                                                                         | NA               |
|                          |     | (c) Consider use of a flow diagram                                                                                                                                                                           | NA               |
| Descriptive data         | 14* | (a) Give characteristics of study participants (eg demographic, clinical, social) and information on exposures and potential confounders                                                                     | P8,L1-5          |
|                          |     | (b) Indicate number of participants with missing data for each variable of interest                                                                                                                          | P8,L7            |
| Outcome data             | 15* | Report numbers of outcome events or summary measures                                                                                                                                                         | P9,L1-10         |
| Main results             | 16  | (a) Give unadjusted estimates and, if applicable, confounder-adjusted estimates and their precision (eg, 95% confidence interval). Make clear which confounders were adjusted for and why they were included | Page 10, Table 2 |
|                          |     | (b) Report category boundaries when continuous variables were categorized                                                                                                                                    | NA               |
|                          |     | (c) If relevant, consider translating estimates of relative risk into absolute risk for a meaningful time period                                                                                             | NA               |
| Other analyses           | 17  | Report other analyses done—eg analyses of subgroups and interactions, and sensitivity analyses                                                                                                               | NA               |
| <b>Discussion</b>        |     |                                                                                                                                                                                                              |                  |
| Key results              | 18  | Summarise key results with reference to study objectives                                                                                                                                                     | P14-16           |
| Limitations              | 19  | Discuss limitations of the study, taking into account sources of potential bias or imprecision. Discuss both direction and magnitude of any potential bias                                                   | P16, L7-11       |
| Interpretation           | 20  | Give a cautious overall interpretation of results considering objectives, limitations, multiplicity of analyses, results from similar studies, and other relevant evidence                                   | P16, L7-8        |
| Generalisability         | 21  | Discuss the generalisability (external validity) of the study results                                                                                                                                        | P16, L10-11      |
| <b>Other information</b> |     |                                                                                                                                                                                                              |                  |
| Funding                  | 22  | Give the source of funding and the role of the funders for the present study and, if applicable, for the original study on which the present article is based                                                | NA               |

Abb: NA- Not applicable

\*Give information separately for cases and controls in case-control studies and, if applicable, for exposed and unexposed groups in cohort and cross-sectional studies.

**Note:** An Explanation and Elaboration article discusses each checklist item and gives methodological background and published examples of transparent reporting. The STROBE checklist is best used in conjunction with this article (freely available on the Web sites of PLoS Medicine at <http://www.plosmedicine.org/>, Annals of Internal Medicine at <http://www.annals.org/>, and Epidemiology at <http://www.epidem.com/>). Information on the STROBE Initiative is available at [www.strobe-statement.org](http://www.strobe-statement.org).

1  
2  
3  
4  
5  
6  
7  
8  
9  
10  
11  
12  
13  
14  
15  
16  
17  
18  
19  
20  
21  
22  
23  
24  
25  
26  
27  
28  
29  
30  
31  
32  
33  
34  
35  
36  
37  
38  
39  
40  
41  
42  
43  
44  
45  
46  
47

For peer review only
